# Supplementary material
Source: PubMed Central journal article supplement (PMC4344210)
Supplement: nn505895j_si_001.pdf [file nn505895j_si_001.pdf]

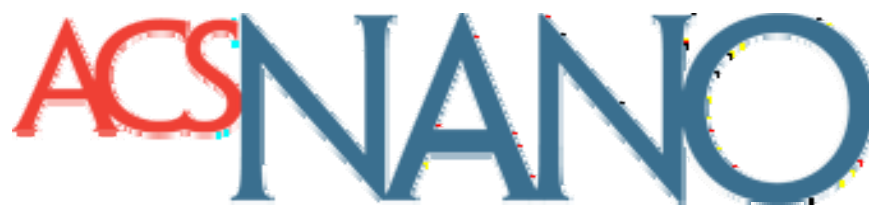

## Anticancer Activity Expressed by a Library of 2,9-Diazaperopyrenium Dications

Karel J. Hartlieb,<sup>†</sup> Leah S. Witus,<sup>†</sup> Daniel P. Ferris,<sup>†</sup> Ashish N. Basuray,<sup>†</sup>

Mohammed M. Algaradah,<sup>⊥</sup> Amy A. Sarjeant,<sup>†</sup> Charlotte L. Stern,<sup>†</sup>

Majed S. Nassar,<sup>⊥</sup> Youssry Y. Botros,<sup>‡</sup> J. Fraser Stoddart<sup>†,\*</sup>

<sup>†</sup> Department of Chemistry  
Northwestern University  
2145 Sheridan Road,  
Evanston, IL 60208, USA  
\* Email: stoddart@northwestern.edu  
Tel: (+1)-847-491-3793  
Fax: (+1)-847-491-1009

<sup>⊥</sup> Joint Center of Excellence in Integrated Nano-Systems (JCIN)  
King Abdul-Aziz City for Science and Technology (KACST)  
P.O. Box 6068, Riyadh 11442  
Kingdom of Saudia Arabia

<sup>‡</sup> University Research Office  
Intel Corporation  
Building RNB-6-61  
2200 Mission College Boulevard  
Santa Clara, CA 95054, USA

### SUPPORTING INFORMATION

#### Table of Contents

|                                                                         |                |
|-------------------------------------------------------------------------|----------------|
| <b>S1. Experimental Procedures</b>                                      | <b>S2–S9</b>   |
| <b>S2. <sup>1</sup>H and <sup>13</sup>C NMR Spectroscopy</b>            | <b>S10–S17</b> |
| <b>S3. Cell Viability Studies and 50% Inhibitory Concentration Data</b> | <b>S18–S21</b> |
| <b>S4. Dynamic Light Scattering Data</b>                                | <b>S21–S32</b> |
| <b>S5. References</b>                                                   | <b>S33</b>     |

## S1. Experimental Procedures

**Materials and General Methods:** All reagents were purchased from commercial suppliers and used without further purification. 3,4,9,10-Tetrakis(chloromethyl)perylene,<sup>1</sup> *N,N'*-bis(2-[2-hydroxyethoxy]ethyl)perylene-3,4:9,10-tetracarboxylic acid bisimide,<sup>2</sup> *N,N'*-bis(2,6-diisopropylphenyl)perylene-3,4:9:10-bis(dicarboximide)<sup>3</sup> (**9**), **1**<sup>2+4</sup>, and **4**<sup>2+4</sup> were all prepared according to literature procedures. All compounds were purified by preparative RP-HPLC (Shimadzu LC-8A), using a C18 column (Waters, XBridge Prep C18 5 $\mu$ m OBD, 19  $\times$  100 mm). The eluants used were MeCN and H<sub>2</sub>O, both mixed with 0.1 % (v/v) trifluoroacetic acid (TFA). All compounds were characterized as their hexafluorophosphate salts. The detector was set to  $\lambda$  = 254 nm. Nuclear magnetic resonance (NMR) spectra were recorded at 298 K on a Bruker Avance III 500 spectrometer, with working frequencies of 499.373 and 125.579 MHz for <sup>1</sup>H and <sup>13</sup>C nuclei, respectively. All <sup>13</sup>C NMR spectra were recorded with the simultaneous decoupling of <sup>1</sup>H nuclei. Chemical shifts are reported in ppm relative to the signals corresponding to the residual non-deuterated solvents (1.94 and 4.33 ppm for CHD<sub>2</sub>CN and CHD<sub>2</sub>NO<sub>2</sub>, respectively for <sup>1</sup>H, 118.26 and 62.8 ppm for CD<sub>3</sub>CN and CD<sub>3</sub>NO<sub>2</sub>, respectively for <sup>13</sup>C). Electrospray Ionization (ESI) mass spectra were obtained on an Agilent 6210 LC-TOF high resolution mass spectrometer. In order to ensure solubility of all dications in aqueous media for biological studies, the hexafluorophosphate counterions were replaced by chloride anions by precipitating the dichloride salt from an MeCN solution of the hexafluorophosphate salt after addition of *n*-butyl ammonium chloride, and subsequent washing with an excess of MeCN to remove any remaining *n*-butyl ammonium chloride and/or hexafluorophosphate.

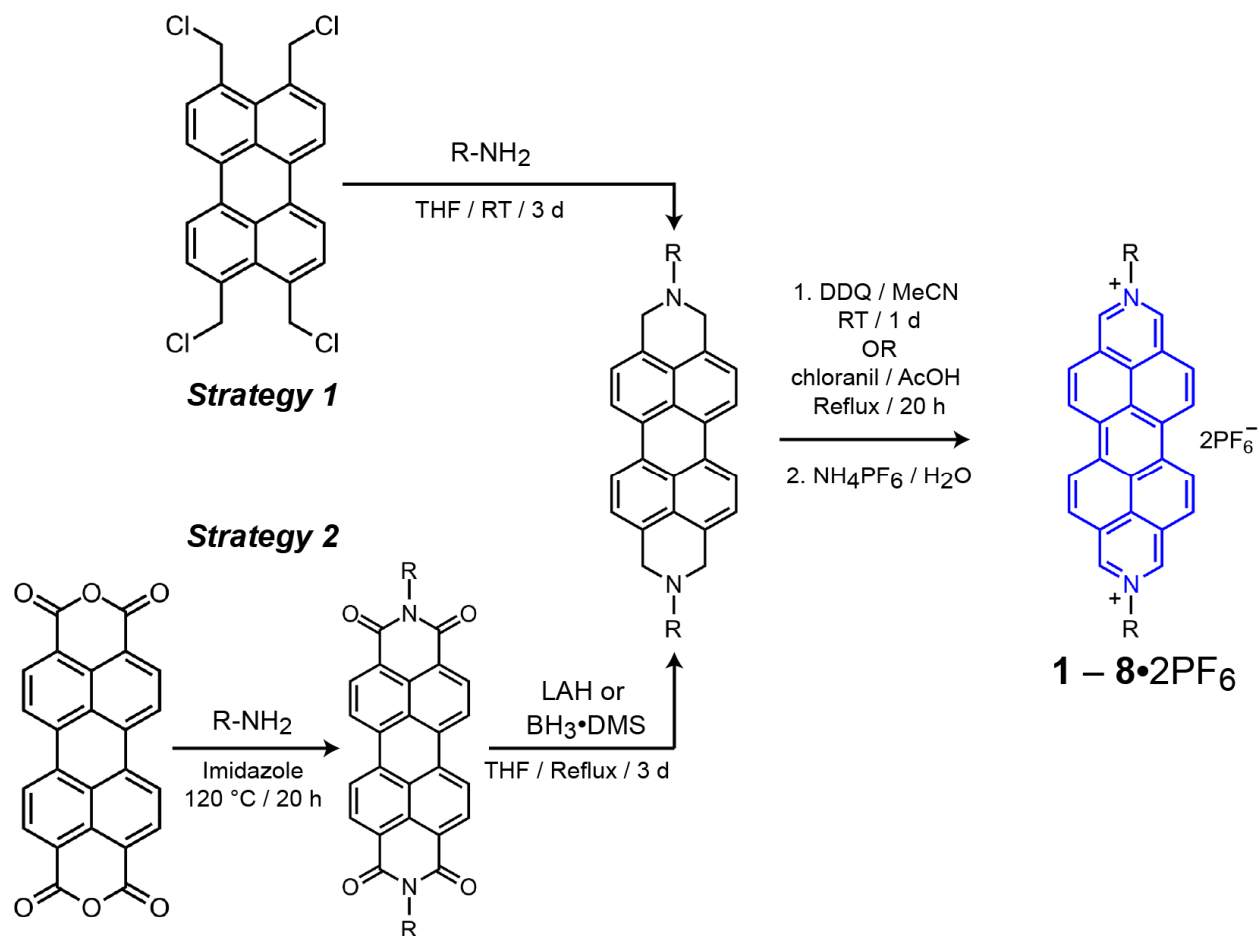

**Scheme S1:** Possible routes towards the synthesis of **1 – 8•2PF<sub>6</sub>**

**2•2PF<sub>6</sub>:** **Strategy 1.** 3,4,9,10-Tetrakis(chloromethyl)perylene (100 mg, 0.22 mmol) was added to neat ethylamine (20 mL) and the solution was stirred at room temperature for 24 h under N<sub>2</sub>. Et<sub>2</sub>O (200 mL) was added in order to precipitate the crude product. The solution was filtered and the residue was washed with Et<sub>2</sub>O (3 × 20 mL) and dried to give a dark red solid (69 mg, 74%). This crude material (69 mg, 0.17 mmol) was then added to MeCN (50 mL), followed by addition of DDQ (372 mg, 1.4 mmol) and this solution was then stirred under reflux in an O<sub>2</sub> atmosphere for 16 h, before being cooled to room temperature. A 32% HCl solution (5 mL) was added to

precipitate the chloride salt of the crude product. The solution was filtered and the residue was dissolved in a 50/50 mixture of (Me)<sub>2</sub>CO/H<sub>2</sub>O, to which excess of aqueous NH<sub>4</sub>PF<sub>6</sub> was added to precipitate the bis(hexafluorophosphate) salt. The solution was filtered and the residue was washed with H<sub>2</sub>O (3 × 20 mL) and dried to give the product **2**•2PF<sub>6</sub> as an orange solid (108 mg, 88%). **Strategy 2.** Perylene-3,4,9,10-tetracarboxylic dianhydride (1g, 2.5 mmol), imidazole (7.5 g) and a catalytic amount of zinc acetate were heated to 120 °C with stirring under an N<sub>2</sub> atmosphere. Upon melting of the imidazole, ethylamine (2M in THF, 5 mL) was added and the mixture was left to stir for 16 h. The crude product was treated with MeOH (30 mL) and 6M HCl solution (10 mL) and the mixture filtered. The residue was washed with MeOH (2 x 30 mL) and Et<sub>2</sub>O (2 x 30 mL) and dried under vacuum. The residue (1.2 g) was then added to a mixture of LiAlH<sub>4</sub> (1.3 g, 34 mmol) in anhydrous THF (250 mL), which was heated and stirred under N<sub>2</sub> for 16 h. The solution was cooled to 0 °C and the reaction was quenched with H<sub>2</sub>O (1.5 mL), 15 % NaOH solution (1.5 mL) and H<sub>2</sub>O (5 mL). The mixture was evaporated to dryness and the residue was subjected to Soxhlet extraction (CHCl<sub>3</sub>) for three days, yielding a crude solid (0.5 g) after evaporation of CHCl<sub>3</sub>. This solid was then added to a mixture of glacial acetic acid (100 mL) and chloranil (1.2 g, 4.9 mmol) which was heated under reflux for 4 h. Upon cooling to room temperature, the mixture was poured into H<sub>2</sub>O (500 mL) and filtered. Excess of aqueous NH<sub>4</sub>PF<sub>6</sub> was then added to the filtrate to precipitate the bis(hexafluorophosphate) salt, which was washed with H<sub>2</sub>O (3 × 20 mL) and dried to give **2**•2PF<sub>6</sub> as an orange solid (170 mg, 10%). <sup>1</sup>H NMR (CD<sub>3</sub>NO<sub>2</sub>, 500 MHz, 298 K): δ = 9.96 (s, 4H), 9.93 (d, <sup>3</sup>J = 9.4 Hz, 4H), 9.01 (d, <sup>3</sup>J = 9.3 Hz, 4H), 5.34 (q, <sup>3</sup>J = 7.4 Hz, 4H), 2.04 (t, <sup>3</sup>J = 7.4 Hz, 6H) ppm. <sup>13</sup>C NMR (CD<sub>3</sub>NO<sub>2</sub>, 125 MHz, 298 K): δ = 139.4, 131.0, 130.6, 130.1, 129.9, 128.0, 123.2, 60.3, 17.6 ppm. ESI-MS: calcd for [M - PF<sub>6</sub>]<sup>+</sup>, m/z = 531.1425, found: m/z = 531.1406.

**3•2PF<sub>6</sub>**: 3,4,9,10-Tetrakis(chloromethyl)perylene (100 mg, 0.22 mmol) was added to neat isopropylamine (20 mL) and the solution was stirred at room temperature for 24 h under N<sub>2</sub>. Et<sub>2</sub>O (200 mL) was added in order to precipitate the crude product. The solution was filtered and the residue was washed with Et<sub>2</sub>O (3 × 20 mL) and dried to give a brown solid (71 mg). This crude material (60 mg) was then added to MeCN (50 mL), followed by addition of DDQ (250 mg, 1.1 mmol) and the solution was then stirred at room temperature for 16 h. A 32% aqueous HCl solution (5 mL) and Et<sub>2</sub>O (100 mL) were added to precipitate the dichloride salt of the crude product. The solution was filtered and the residue was dissolved in a 50/50 mixture of (Me)<sub>2</sub>CO/H<sub>2</sub>O, to which an excess of aqueous NH<sub>4</sub>PF<sub>6</sub> was added in order to precipitate the bis(hexafluorophosphate) salt. The solution was filtered and the residue was washed with H<sub>2</sub>O (3 × 20 mL) and dried to give **3•2PF<sub>6</sub>** as a brown/orange solid (21 mg, 14%). <sup>1</sup>H NMR (CD<sub>3</sub>CN, 500 MHz, 298 K): δ = 9.91 (s, 4H), 9.84 (d, <sup>3</sup>J = 9.2 Hz, 4H), 8.92 (d, <sup>3</sup>J = 9.2 Hz, 4H), 5.50 (sep, <sup>3</sup>J = 6.8 Hz, 2H), 1.98 (d, <sup>3</sup>J = 6.7 Hz, 12H) ppm. <sup>13</sup>C NMR (CD<sub>3</sub>CN, 125 MHz, 298 K): δ = 137.8, 130.5, 129.8, 129.4, 129.4, 127.5, 122.6, 67.4, 23.8 ppm. ESI-MS: calcd for [M – PF<sub>6</sub>]<sup>+</sup>, *m/z* = 559.1738, found: *m/z* = 559.1742.

**5•2PF<sub>6</sub>**: *N,N'*-Bis(2-[2-hydroxyethoxy]ethyl)-perylene-3,4,9,10-tetracarboxylic acid bisimide (2.5 g, 4.4 mmol) was added to anhydrous THF (200 mL), followed by slow addition of BH<sub>3</sub>-DMS (2M in THF, 50 mL) and the solution was stirred under reflux for 5 days under N<sub>2</sub>. After cooling the solution to room temperature, the solution was quenched by the slow addition of MeOH (200 mL). Conc. HCl (6M, 100 mL) was added and the solution was stirred under reflux for 3 h. Upon cooling the solution to room temperature, the solvent was removed under vacuum and the residue was suspended in a saturated K<sub>2</sub>CO<sub>3</sub> solution until the pH reached 10. The

suspension was then filtered and the residue was washed with H<sub>2</sub>O (3 × 50 mL) and dried to give a brown solid (1.4 g, 62%). This crude material (1.2 g) was then added to a MeCN/CH<sub>2</sub>Cl<sub>2</sub> 50:50 mixture (200 mL), followed by addition of DDQ (4.4 g, 19.4 mmol) and this solution was then stirred at RT for 3 days. A 32% aqueous HCl solution (5 mL) and Et<sub>2</sub>O (100 mL) were added in order to precipitate the dichloride salt of the crude product. The solution was filtered and the residue was dissolved in H<sub>2</sub>O (50 mL), to which excess of aqueous NH<sub>4</sub>PF<sub>6</sub> was added so as to precipitate the bis(hexafluorophosphate) salt. The solution was filtered and the residue was washed with H<sub>2</sub>O (3 × 20 mL) and dried to give **5•2PF<sub>6</sub>** as a brown/orange solid (0.47 g, 13%). <sup>1</sup>H NMR (CD<sub>3</sub>CN, 500 MHz, 298 K): δ = 9.72 (s, 4H), 8.41 (br s, 4H), 8.18 (d, <sup>3</sup>J = 9.0 Hz, 4H), 5.31 (t, <sup>3</sup>J = 4.8 Hz, 4H), 4.35 (t, <sup>3</sup>J = 4.8 Hz, 4H), 3.78 (s, 8H) ppm. <sup>13</sup>C NMR (CD<sub>3</sub>CN, 125 MHz, 298 K): δ = 140.1, 128.9, 128.1, 127.9, 127.8, 127.0, 120.6, 73.6, 69.9, 63.6, 61.8 ppm. ESI-MS: calcd for [M – PF<sub>6</sub>]<sup>+</sup>, m/z = 651.1847, found: m/z = 651.1848.

**6•2PF<sub>6</sub>**: 3,4,9,10-Tetrakis(chloromethyl)perylene (100 mg, 0.22 mmol) was added to anhydrous THF (20 mL), followed by addition of *p*-toluidine (4.8 g) and the solution was stirred at 60°C for 16 h under N<sub>2</sub>. After cooling the solution to room temperature, Et<sub>2</sub>O (200 mL) was added to precipitate the crude product. The solution was filtered and the residue was washed with Et<sub>2</sub>O (3 × 20 mL) and dried to give a brown solid (110 mg, 95%). This crude material (100 mg, 0.19 mmol) was then added to a MeCN/CH<sub>2</sub>Cl<sub>2</sub> 50:50 mixture (50 mL), followed by addition of DDQ (530 mg, 2.3 mmol) and this solution was then heated to 40°C for 3 days. Upon cooling the solution to room temperature, a 32% aqueous HCl solution (5 mL) and Et<sub>2</sub>O (100 mL) were added to precipitate the dichloride salt of the crude product. The solution was filtered and the residue was dissolved in a 50/50 mixture of (Me)<sub>2</sub>CO/H<sub>2</sub>O, to which an excess of aqueous

$\text{NH}_4\text{PF}_6$  was added to precipitate the bis(hexafluorophosphate) salt. The solution was filtered and the residue was washed with  $\text{H}_2\text{O}$  ( $3 \times 20$  mL) and dried to give **6•2PF<sub>6</sub>** as a brown/orange solid (20 mg, 13%).  $^1\text{H}$  NMR ( $\text{CD}_3\text{CN}$ , 500 MHz, 298 K):  $\delta = 10.07$  (s, 4H), 9.78 (d,  $^3J = 9.3$  Hz, 4H), 8.94 (d,  $^3J = 9.3$  Hz, 4H), 7.97 (d,  $^3J = 8.4$  Hz, 4H), 7.73 (d,  $^3J = 8.4$  Hz, 4H), 2.61 (s, 6H) ppm.  $^{13}\text{C}$  NMR ( $\text{CD}_3\text{CN}$ , 125 MHz, 298 K):  $\delta = 143.6, 142.3, 139.4, 132.2, 130.2, 130.1, 129.8, 129.2, 127.7, 125.9, 122.6, 21.3$  ppm. ESI-MS: calcd for  $[\text{M} - 2\text{PF}_6]^{2+}$ ,  $m/z = 255.1048$ , found:  $m/z = 255.1051$ .

**7•2PF<sub>6</sub>**: 3,4,9,10-Tetrakis(chloromethyl)perylene (145 mg, 0.32 mmol) was added to neat *m*-toluidine (20 mL) and the solution was stirred at 60°C for 24 h under  $\text{N}_2$ . After cooling the solution to room temperature,  $\text{Et}_2\text{O}$  (200 mL) was added to precipitate the crude product. The solution was filtered and the residue was washed with  $\text{Et}_2\text{O}$  ( $3 \times 20$  mL) and dried to give a brown solid (165 mg, quant). This crude material (150 mg, 0.29 mmol) was added to a  $\text{MeCN}/\text{CH}_2\text{Cl}_2$  50:50 mixture (50 mL), followed by addition of DDQ (250 mg, 1.1 mmol) and this solution was heated to 60°C for 16 h. Upon cooling the solution to room temperature, a 32% aqueous HCl solution (5 mL) and  $\text{Et}_2\text{O}$  (100 mL) were added to precipitate the dichloride salt of the crude product. The solution was filtered and the residue was dissolved in a 50/50 mixture of  $(\text{Me})_2\text{CO}/\text{H}_2\text{O}$ , to which an excess of aqueous  $\text{NH}_4\text{PF}_6$  was added to precipitate the bis(hexafluorophosphate) salt. The solution was filtered and the residue was washed with  $\text{H}_2\text{O}$  ( $3 \times 20$  mL) and dried to give **7•2PF<sub>6</sub>** a brown/orange solid (23 mg, 10%).  $^1\text{H}$  NMR ( $\text{CD}_3\text{CN}$ , 500 MHz, 298 K):  $\delta = 10.09$  (s, 4H), 9.89 (d,  $^3J = 9.3$  Hz, 4H), 8.99 (d,  $^3J = 9.3$  Hz, 4H), 7.93 (s, 2H), 7.89 (d,  $^3J = 7.8$  Hz, 2H), 7.79 (t,  $^3J = 7.8$  Hz, 4H), 7.73 (d,  $^3J = 7.8$  Hz, 2H), 2.63 (s, 6H) ppm.  $^{13}\text{C}$  NMR ( $\text{CD}_3\text{CN}$ , 125 MHz, 298 K):  $\delta = 144.6, 142.5, 139.4, 133.3, 131.5, 130.4, 130.2$ ,

129.9, 129.3, 127.7, 126.6, 123.2, 122.7, 21.4 ppm. ESI-MS: calcd for  $[M - 2PF_6]^{2+}$ ,  $m/z = 255.1048$ , found:  $m/z = 255.1053$ .

**8•2PF<sub>6</sub>**: 3,4,9,10-Tetrakis(chloromethyl)perylene (100 mg, 0.22 mmol) was added to neat 2,6-diisopropylaniline (20 mL) and the solution was stirred at 100°C for 24 h under N<sub>2</sub>. After cooling the solution to room temperature, Et<sub>2</sub>O (200 mL) was added to precipitate the crude product. The solution was filtered and the residue was washed with Et<sub>2</sub>O (3 × 20 mL) and dried to give a brown solid (115 mg, 78%). This crude material (91 mg, 0.14 mmol) was added to MeCN (50 mL), followed by addition of DDQ (250 mg, 1.1 mmol) and this solution was then heated under reflux for 16 h. Upon cooling the solution to room temperature, a 32% aqueous HCl solution (5 mL) and Et<sub>2</sub>O (100 mL) were added to precipitate the dichloride salt of the crude product. The solution was filtered and the residue was dissolved in a 50/50 mixture of (CH<sub>3</sub>)<sub>2</sub>CO/H<sub>2</sub>O, to which excess of aqueous NH<sub>4</sub>PF<sub>6</sub> was added to precipitate the bis(hexafluorophosphate) salt. The solution was filtered and the residue was washed with H<sub>2</sub>O (3 × 20 mL) and dried to give **8•2PF<sub>6</sub>** as a brown/orange solid (80 mg, 61%). <sup>1</sup>H NMR (CD<sub>3</sub>CN, 500 MHz, 298 K): δ = 10.06 (d, <sup>3</sup>J = 9.2 Hz, 4H), 9.93 (s, 4H), 9.03 (d, <sup>3</sup>J = 9.2 Hz, 4H), 7.83 (t, <sup>3</sup>J = 7.9 Hz, 2H), 7.65 (d, <sup>3</sup>J = 7.9 Hz, 4H), 2.12 (sep, <sup>3</sup>J = 6.7 Hz, 4H), 1.20 (d, <sup>3</sup>J = 6.7 Hz, 24H) ppm. <sup>13</sup>C NMR (CD<sub>3</sub>CN, 125 MHz, 298 K): δ = 145.0, 140.4, 140.3, 133.4, 131.4, 130.6, 130.3, 129.8, 128.1, 126.0, 122.9, 29.3, 24.2 ppm. ESI-MS: calcd for  $[M - 2PF_6]^{2+}$ ,  $m/z = 325.1830$ , found:  $m/z = 325.1839$ .

**A•2PF<sub>6</sub>**: The crude material (70 mg) produced from the reaction between 3,4,9,10-tetrakis(chloromethyl)perylene and isopropylamine, was acidified addition of conc HCl (6M, 50 mL) and the suspension was filtered to remove insoluble impurities. Excess of NH<sub>4</sub>PF<sub>6</sub> was added to the filtrate to precipitate the crude product as a bis(hexafluorophosphate) salt.



Purification by RP-HPLC, followed by conversion back to the bis(hexafluorophosphate) salt using aqueous  $\text{NH}_4\text{PF}_6$ , gave **A•2PF<sub>6</sub>** as a yellow solid (27 mg, 17%). <sup>1</sup>H NMR ( $\text{CD}_3\text{CN}$ , 500 MHz, 298 K):  $\delta$  = 8.21 (d, <sup>3</sup>*J* = 7.6 Hz, 4H), 7.44 (d, <sup>3</sup>*J* = 7.6 Hz, 4H), 4.68 (s, 8H), 3.83 (sep, <sup>3</sup>*J* = 6.7 Hz, 2H), 1.51 (d, <sup>3</sup>*J* = 6.7 Hz, 12H) ppm. <sup>13</sup>C NMR ( $\text{CD}_3\text{CN}$ , 125 MHz, 298 K):  $\delta$  = 131.6, 128.2, 128, 126.9, 126.2, 121.9, 59.8, 52.0, 17.4 ppm. ESI-MS: calcd for  $[(M - \text{PF}_6) - \text{HPF}_6]^+$ , *m/z* = 419.2487, found: *m/z* = 419.2491.

**B•2PF<sub>6</sub>**: The crude material (1.2 g) produced from the reduction of *N,N'*-bis(2-[2-hydroxyethoxy]ethyl)-perylene-3,4,9,10-tetracarboxylic acid bisimide, was acidified by addition of conc HCl (6M, 50 mL), and the suspension was filtered to remove insoluble impurities. An excess of aqueous  $\text{NH}_4\text{PF}_6$  was added to the filtrate to precipitate the crude product as the bis(hexafluorophosphate) salt. Purification by RP-HPLC, followed by conversion back to the bis(hexafluorophosphate) salt using  $\text{NH}_4\text{PF}_6$  gave **B•2PF<sub>6</sub>** as a yellow solid (0.53 g, 15%). <sup>1</sup>H NMR ( $\text{CD}_3\text{CN}$ , 500 MHz, 298 K):  $\delta$  = 8.34 (d, <sup>3</sup>*J* = 7.8 Hz, 4H), 7.51 (d, <sup>3</sup>*J* = 7.8 Hz, 4H), 4.79 (s, 8H), 3.96 – 3.87 (m, 4H), 3.68 – 3.60 (m, 8H), 3.53 – 3.46 (m, 4H) ppm. <sup>13</sup>C NMR ( $\text{CD}_3\text{CN}$ , 125 MHz, 298 K):  $\delta$  = 131.8, 128.3, 127.9, 126.6, 125.9, 122.1, 72.9, 64.5, 61.8, 55.4, 55.0 ppm. ESI-MS: calcd for  $[(M - \text{PF}_6) - \text{HPF}_6]^+$ , *m/z* = 511.2591, found: *m/z* = 511.2599.

## S2. $^1\text{H}$ and $^{13}\text{C}$ NMR Spectroscopy

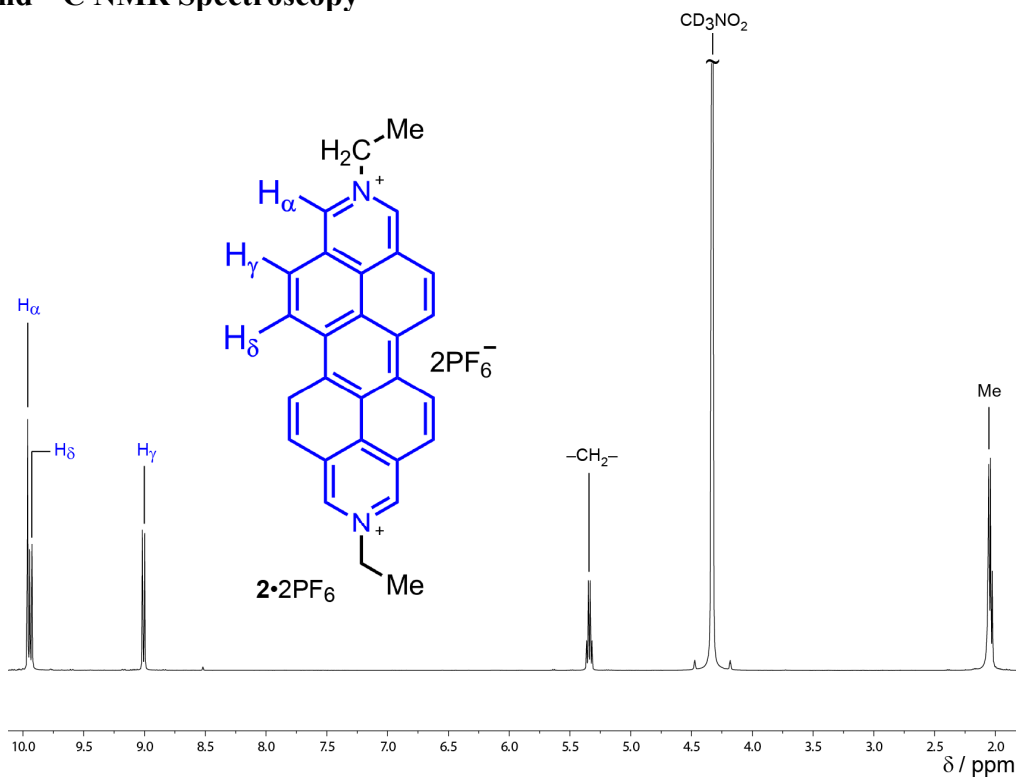

Figure S1.  $^1\text{H}$  NMR Spectrum (500 MHz,  $\text{CD}_3\text{NO}_2$ , 298 K) of  $2 \cdot 2\text{PF}_6$

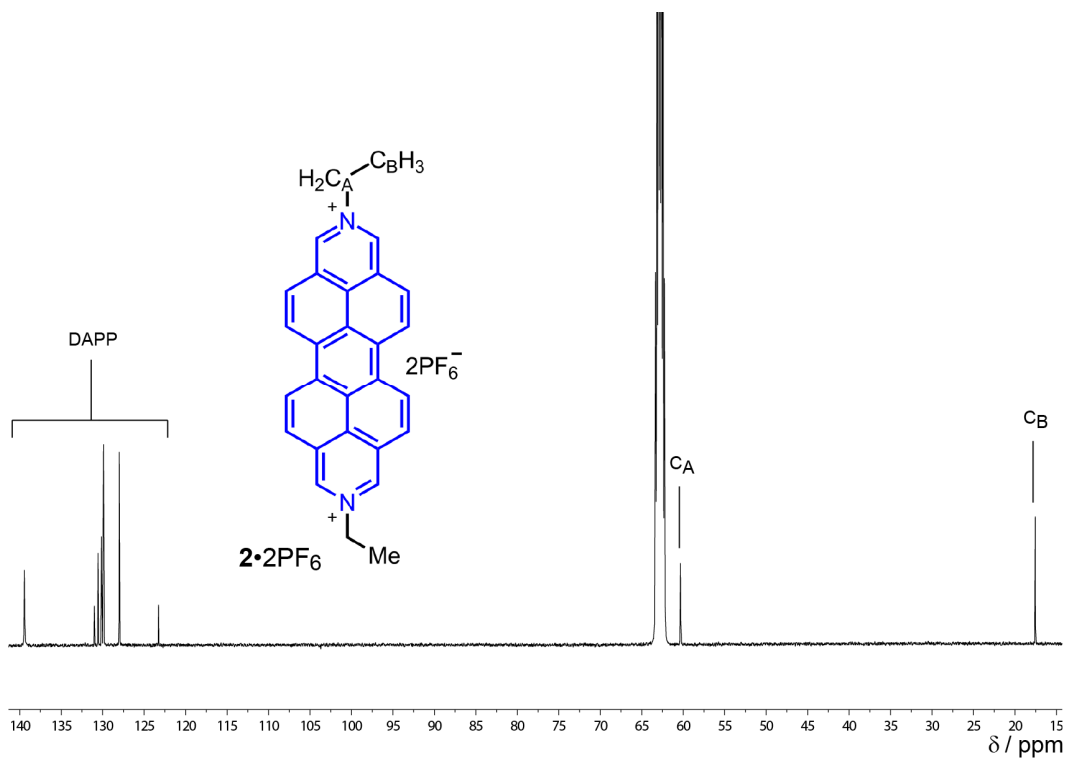

Figure S2.  $^{13}\text{C}$  NMR Spectrum (125 MHz,  $\text{CD}_3\text{NO}_2$ , 298 K) of  $2 \cdot 2\text{PF}_6$

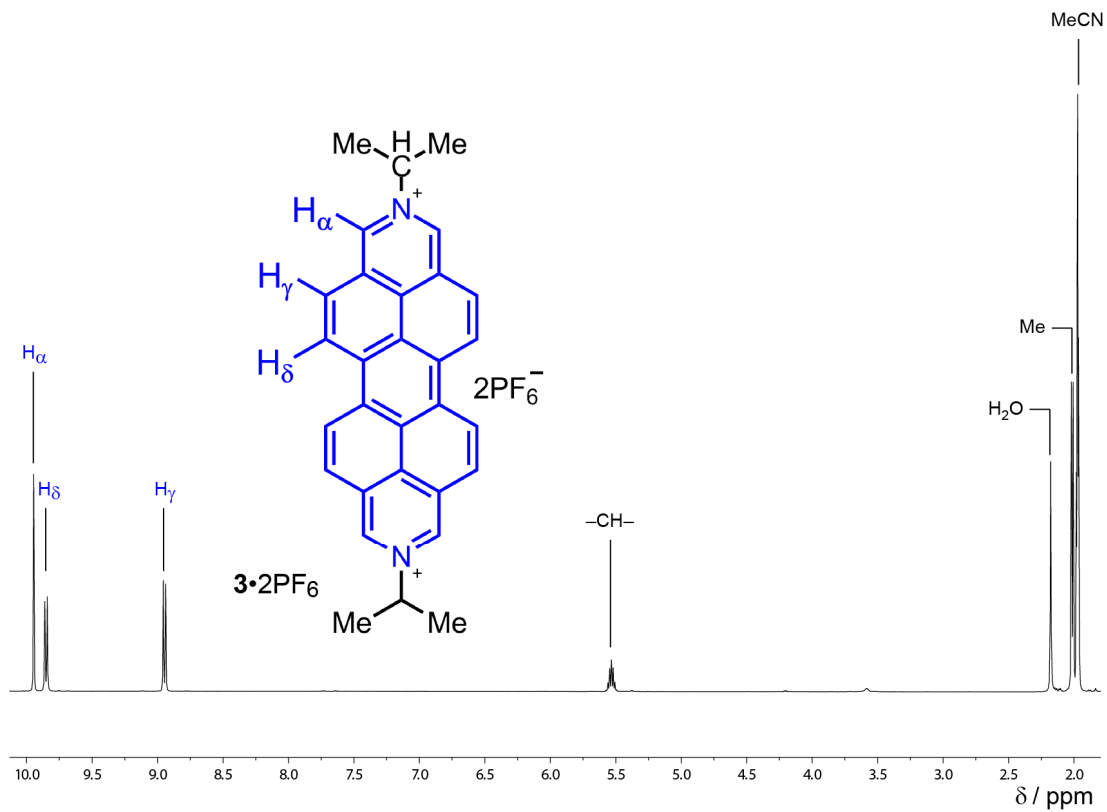

Figure S3.  $^1\text{H}$  NMR Spectrum (500 MHz,  $\text{CD}_3\text{CN}$ , 298 K) of  $3 \cdot 2\text{PF}_6^-$

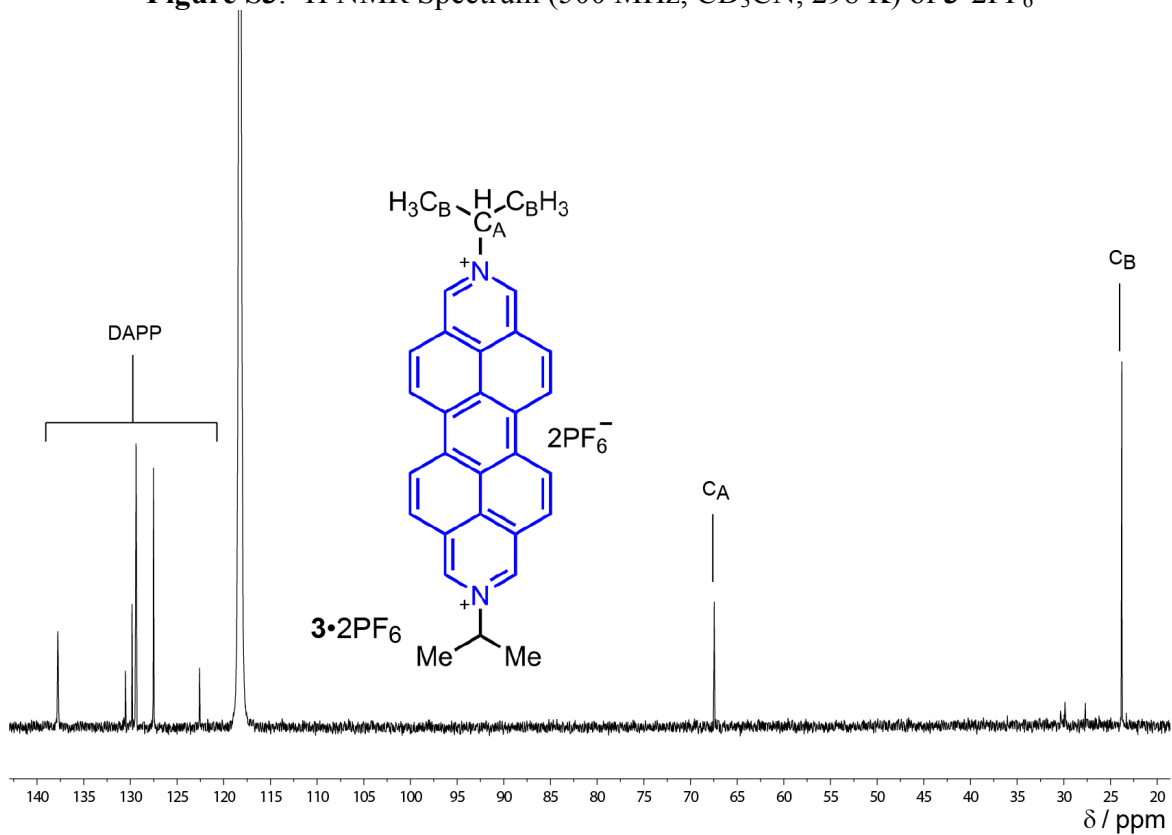

Figure S4.  $^{13}\text{C}$  NMR Spectrum (125 MHz,  $\text{CD}_3\text{CN}$ , 298 K) of  $3 \cdot 2\text{PF}_6^-$

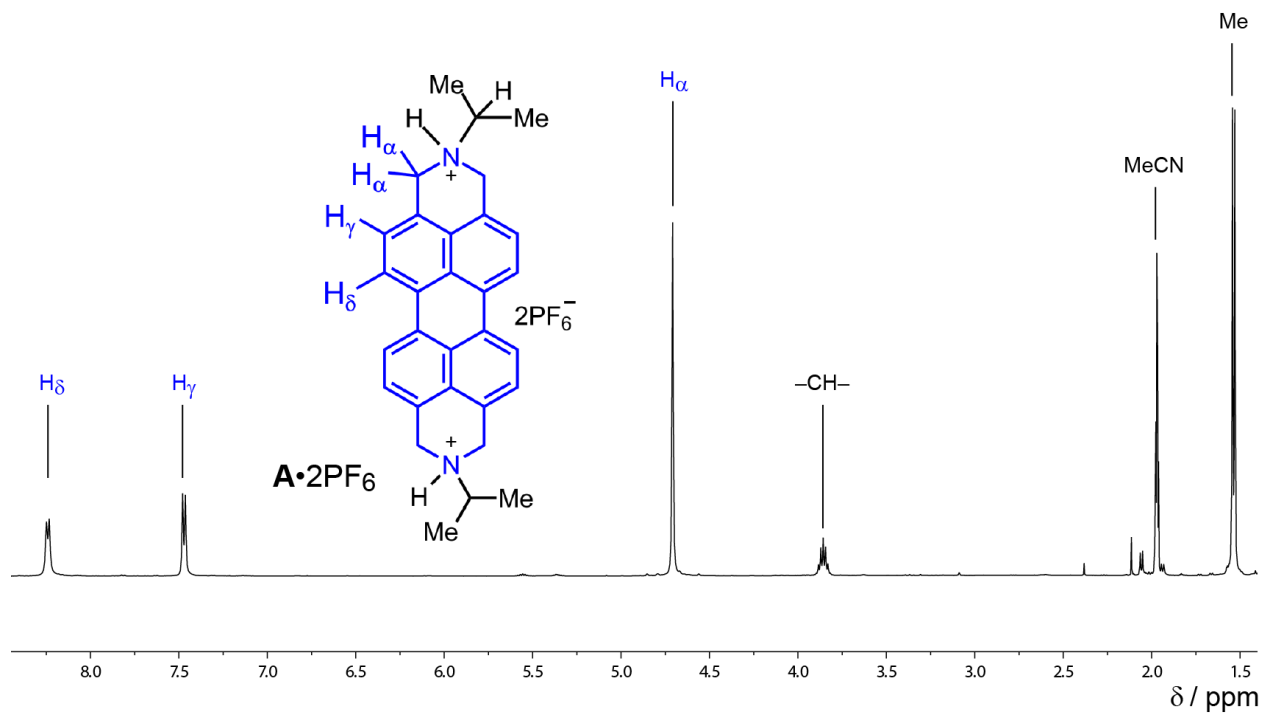

**Figure S5.**  $^1\text{H}$  NMR Spectrum (500 MHz,  $\text{CD}_3\text{CN}$ , 298 K) of  $\text{A}\cdot 2\text{PF}_6$

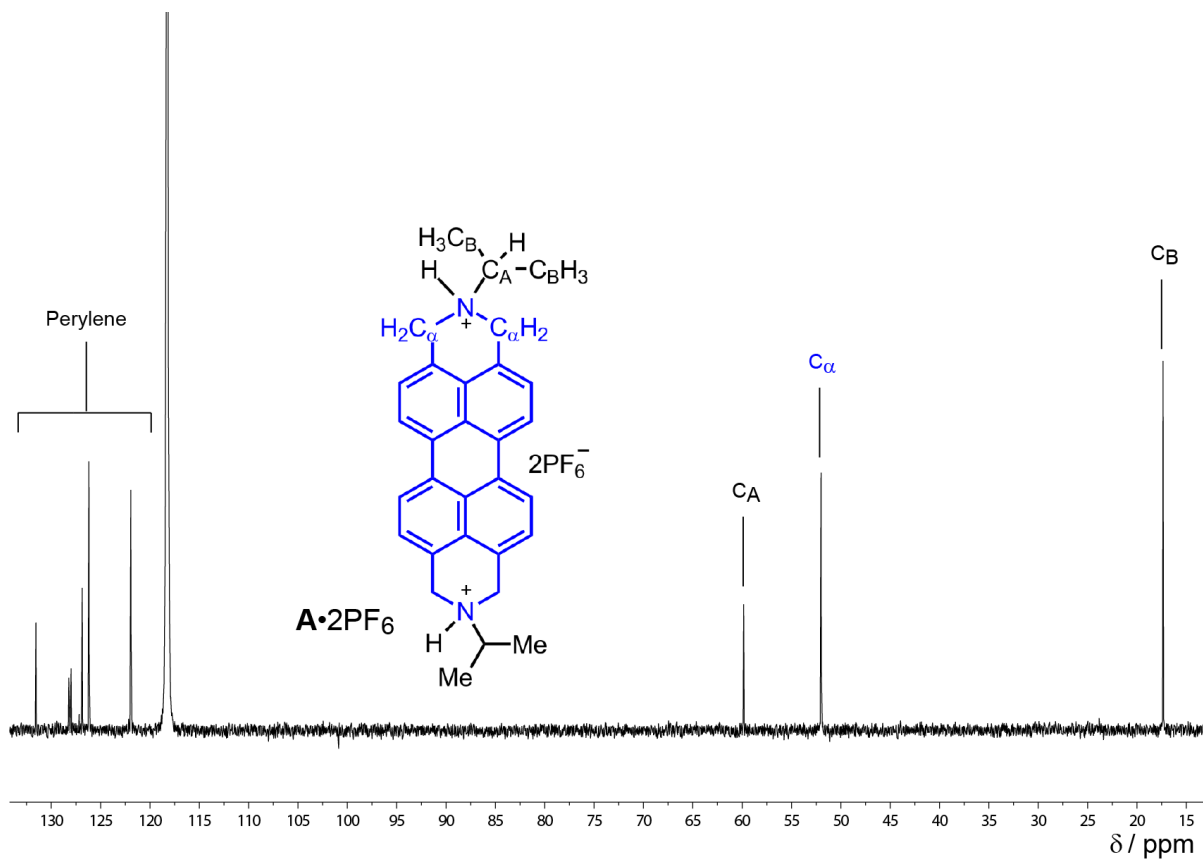

**Figure S6.**  $^{13}\text{C}$  NMR Spectrum (125 MHz,  $\text{CD}_3\text{CN}$ , 298 K) of  $\text{A}\cdot 2\text{PF}_6$

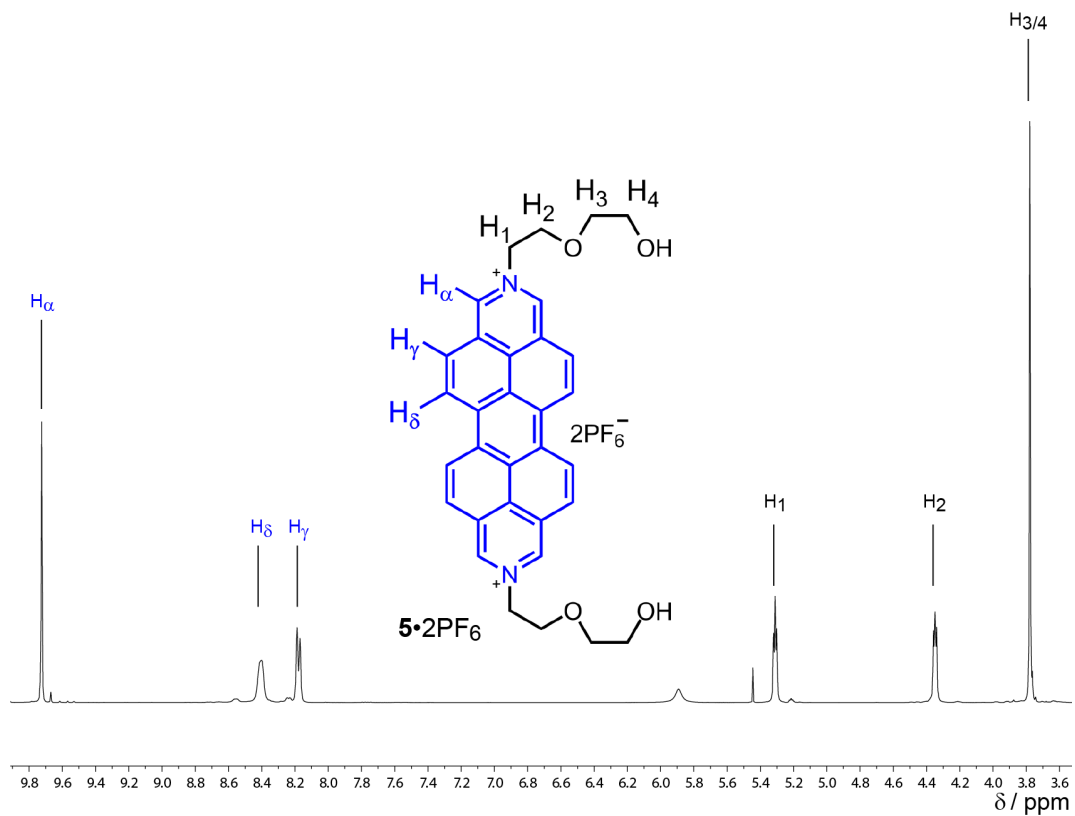

**Figure S7.**  $^1\text{H}$  NMR Spectrum (500 MHz,  $\text{CD}_3\text{CN}$ , 298 K) of  $5 \cdot 2\text{PF}_6$

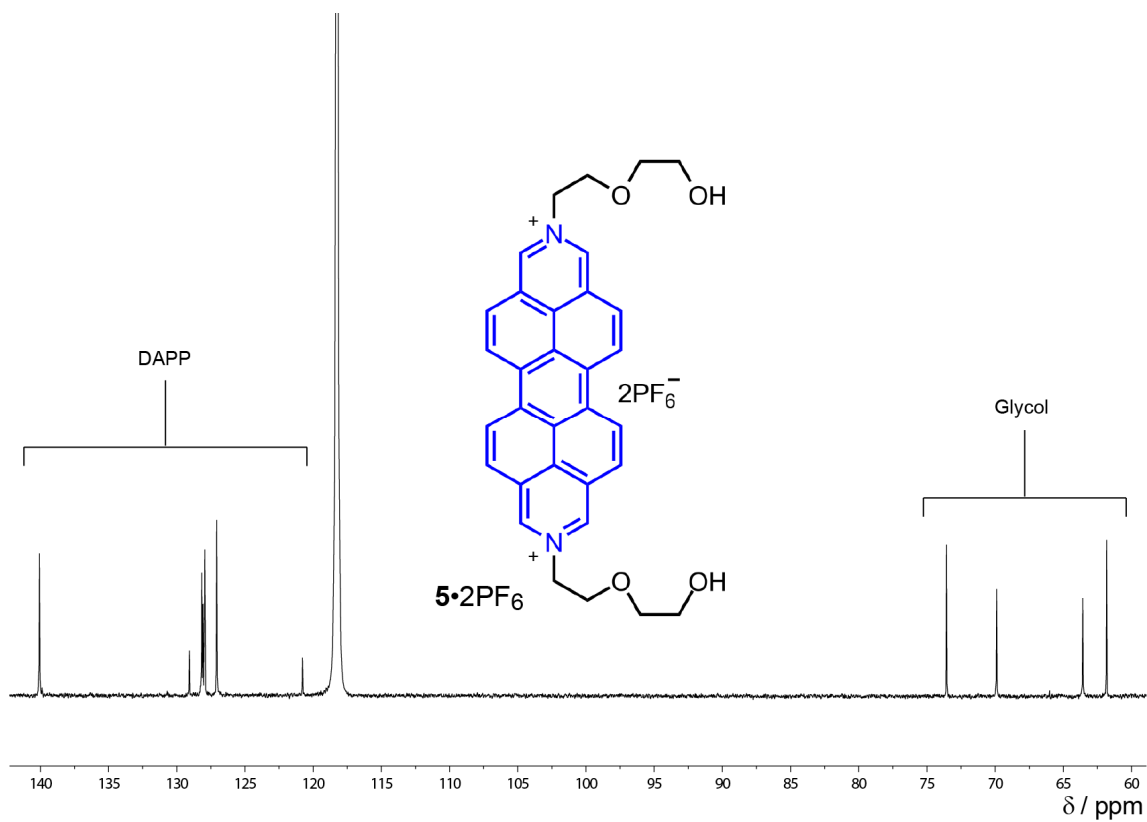

**Figure S8.**  $^{13}\text{C}$  NMR Spectrum (125 MHz,  $\text{CD}_3\text{CN}$ , 298 K) of  $5 \cdot 2\text{PF}_6$

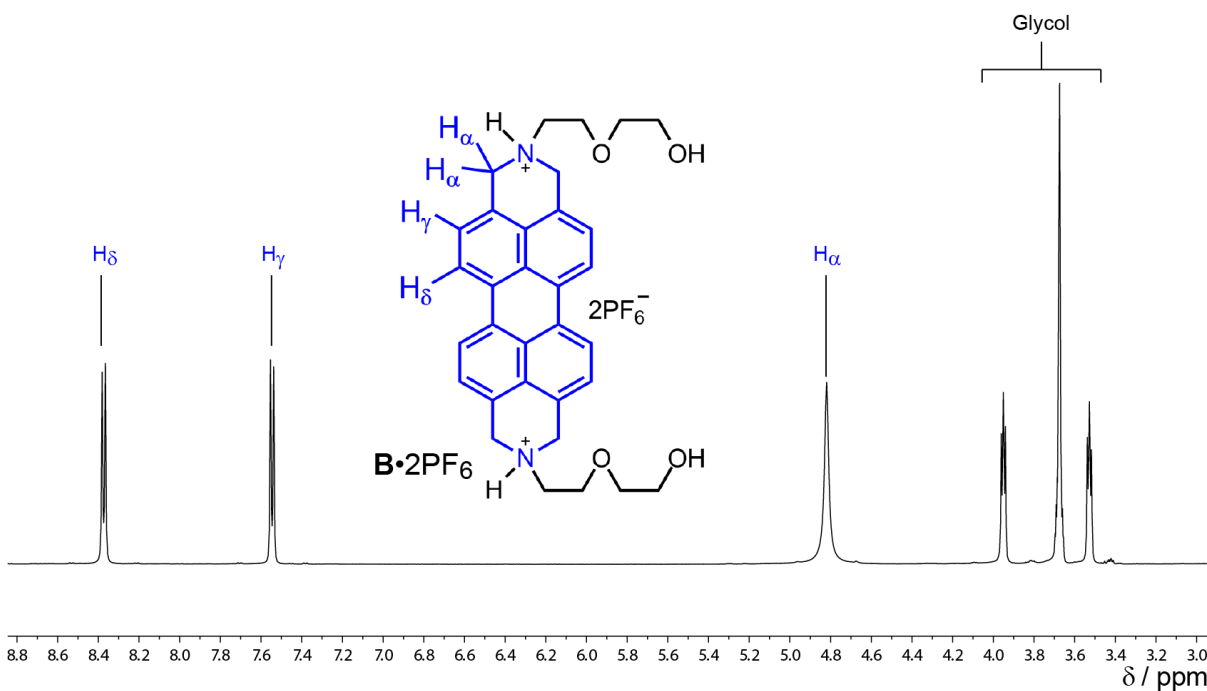

Figure S9.  $^1\text{H}$  NMR Spectrum (500 MHz,  $\text{CD}_3\text{CN}$ , 298 K) of  $\text{B}\cdot 2\text{PF}_6$

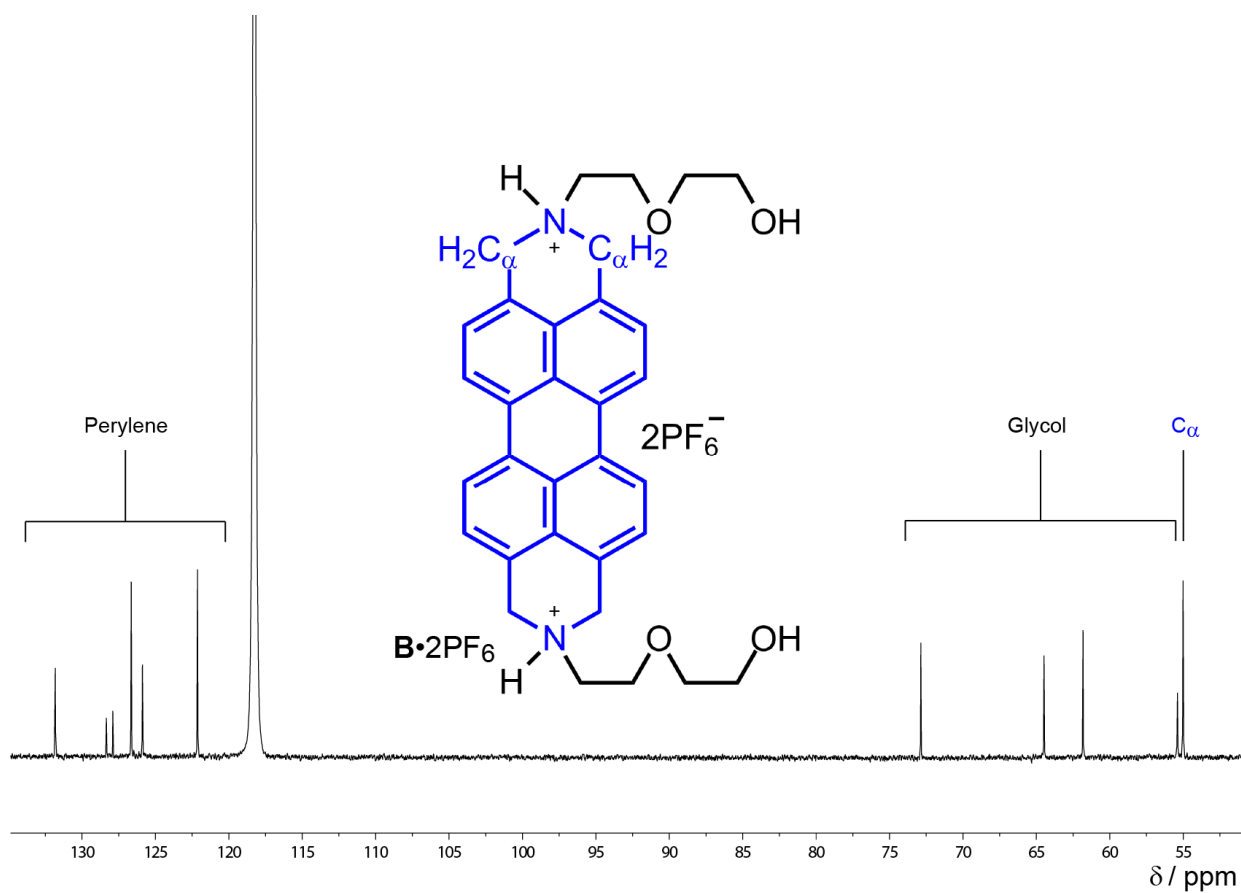

Figure S10.  $^{13}\text{C}$  NMR Spectrum (125 MHz,  $\text{CD}_3\text{CN}$ , 298 K) of  $\text{B}\cdot 2\text{PF}_6$

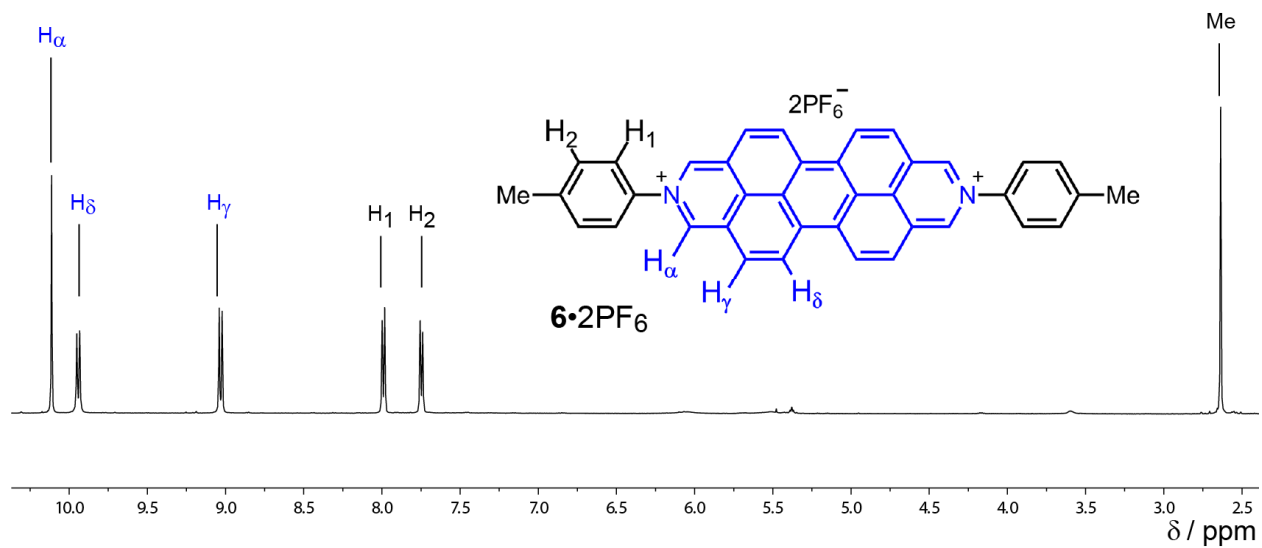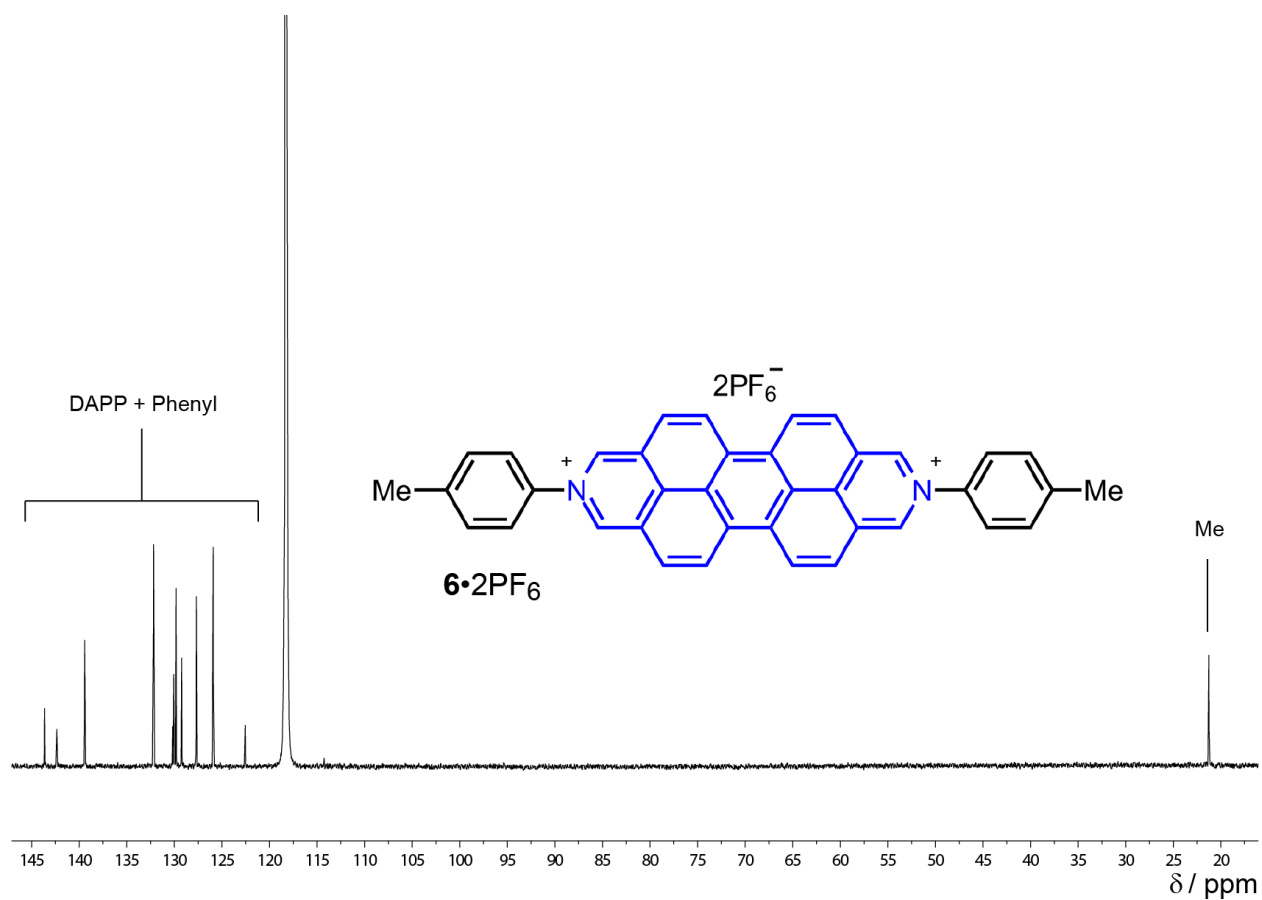

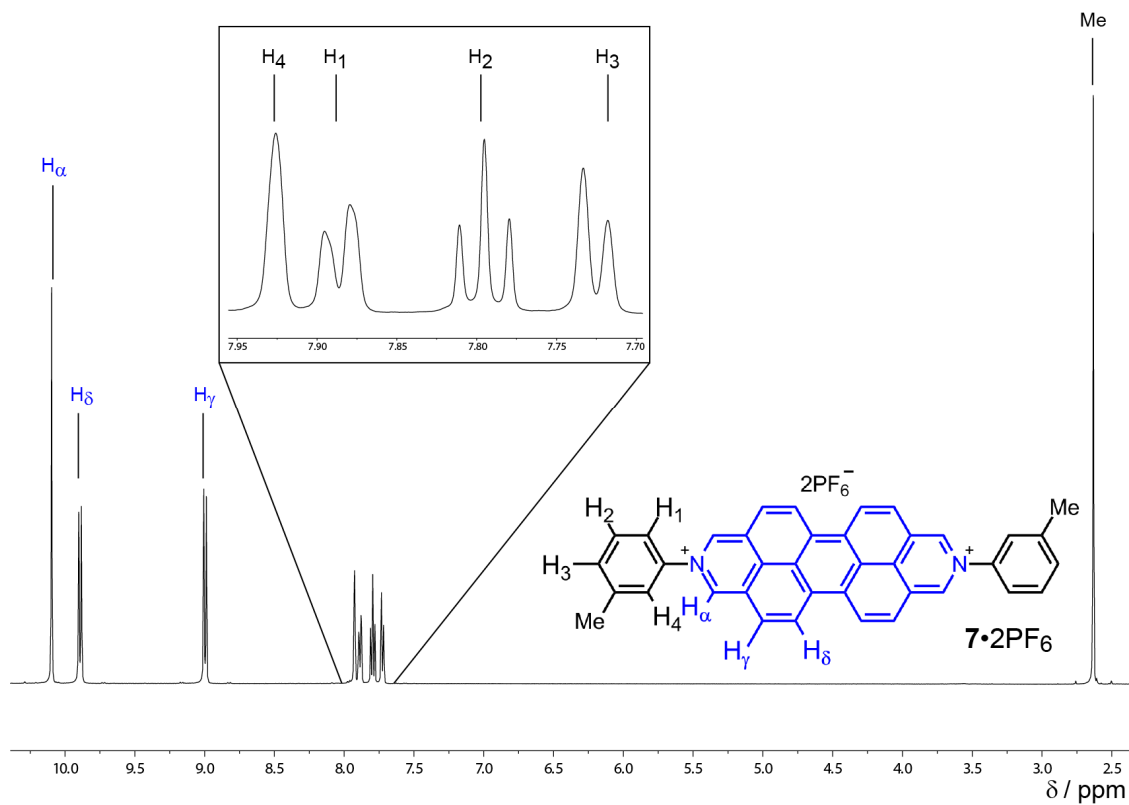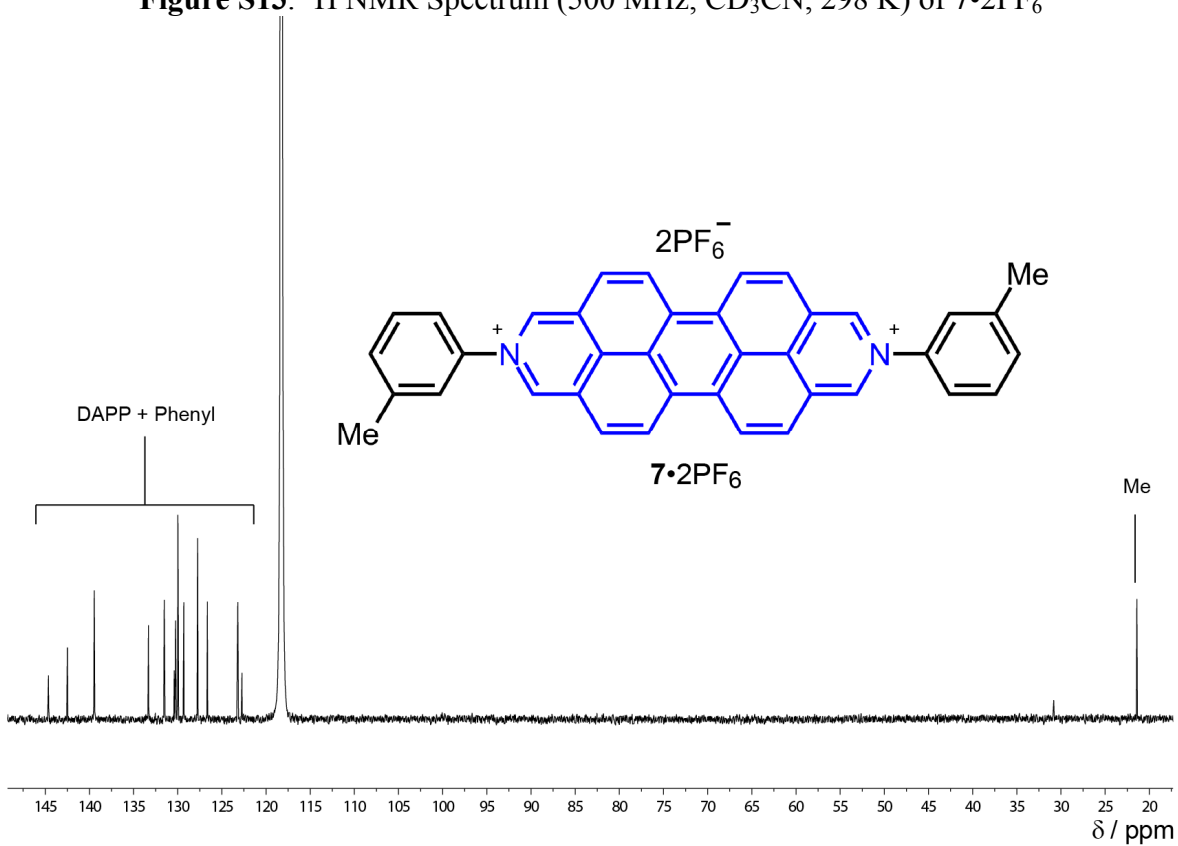



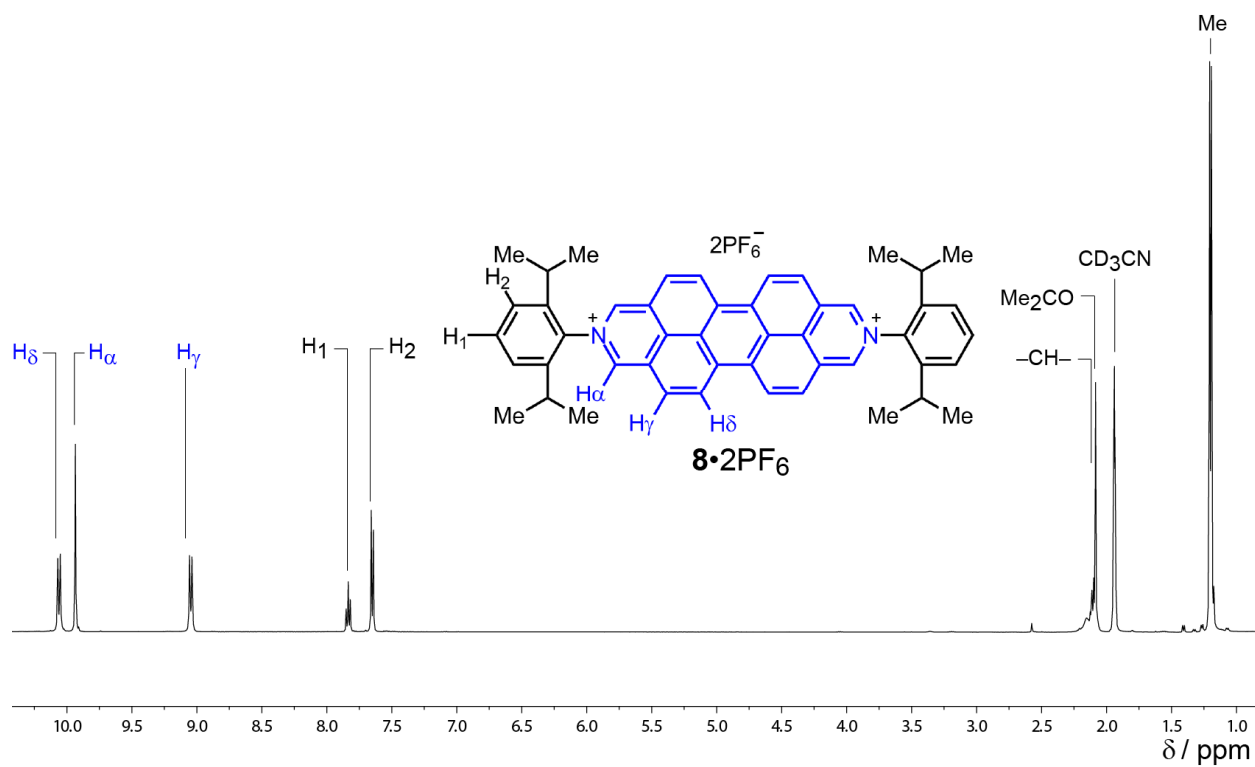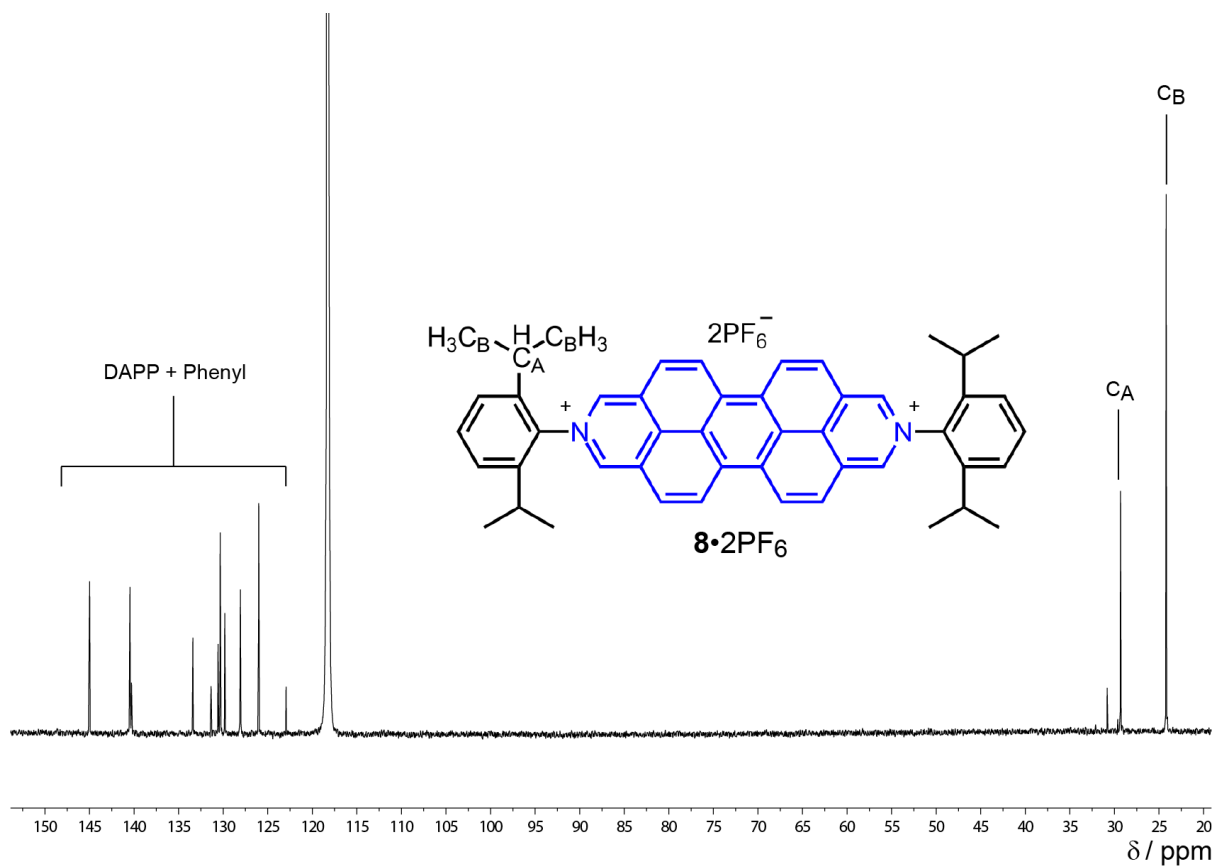

### S3. Cell Viability Studies and 50% Inhibitory Concentration Data

**Table S1: Cell viability data (%) for compounds 1-8•2Cl (10  $\mu$ M) for the 10 cell lines tested.**

|   | FaDu             | SKMEL-2           | HT-29            | HT-1080           | HepG2             | HL-60             | Jurkat            | PC-3              | HeLa              | MDA-MB-231        |
|---|------------------|-------------------|------------------|-------------------|-------------------|-------------------|-------------------|-------------------|-------------------|-------------------|
| 1 | 77.83 $\pm$ 1.17 | 142.57 $\pm$ 2.37 | 75.34 $\pm$ 3.68 | 96.06 $\pm$ 1.45  | 27.82 $\pm$ 0.84  | 105.02 $\pm$ 3.35 | 80.63 $\pm$ 1.68  | 96.97 $\pm$ 2.02  | 67.01 $\pm$ 2.65  | 90.80 $\pm$ 1.48  |
| 2 | 87.57 $\pm$ 2.26 | 100.05 $\pm$ 1.99 | 85.96 $\pm$ 2.81 | 96.76 $\pm$ 1.61  | 49.50 $\pm$ 2.26  | 98.03 $\pm$ 2.99  | 82.38 $\pm$ 1.23  | 98.81 $\pm$ 2.73  | 91.02 $\pm$ 3.26  | 93.54 $\pm$ 1.54  |
| 3 | 63.06 $\pm$ 7.73 | 93.93 $\pm$ 0.83  | 87.28 $\pm$ 1.06 | 42.95 $\pm$ 1.88  | 95.89 $\pm$ 2.52  | 123.19 $\pm$ 4.36 | 100.14 $\pm$ 0.25 | 106.99 $\pm$ 1.28 | 58.51 $\pm$ 0.38  | 81.80 $\pm$ 1.27  |
| 4 | 89.87 $\pm$ 3.32 | 89.69 $\pm$ 3.63  | 83.90 $\pm$ 2.51 | 92.72 $\pm$ 1.45  | 90.00 $\pm$ 4.93  | 96.40 $\pm$ 2.86  | 81.32 $\pm$ 1.41  | 82.95 $\pm$ 2.42  | 62.65 $\pm$ 1.16  | 89.32 $\pm$ 1.53  |
| 5 | 63.50 $\pm$ 1.65 | 153.85 $\pm$ 4.06 | 88.44 $\pm$ 6.46 | 95.38 $\pm$ 2.67  | 44.92 $\pm$ 2.49  | 105.16 $\pm$ 3.44 | 87.92 $\pm$ 2.57  | 89.54 $\pm$ 2.82  | 62.58 $\pm$ 1.15  | 91.07 $\pm$ 0.68  |
| 6 | 85.70 $\pm$ 1.90 | 88.33 $\pm$ 2.60  | 86.36 $\pm$ 8.67 | 105.90 $\pm$ 1.22 | 98.54 $\pm$ 4.08  | 99.74 $\pm$ 3.59  | 83.79 $\pm$ 1.48  | 93.78 $\pm$ 3.76  | 100.87 $\pm$ 0.68 | 100.17 $\pm$ 0.93 |
| 7 | 82.42 $\pm$ 3.12 | 112.03 $\pm$ 2.96 | 80.51 $\pm$ 4.42 | 100.24 $\pm$ 0.82 | 101.12 $\pm$ 3.74 | 101.64 $\pm$ 3.14 | 76.52 $\pm$ 2.51  | 85.25 $\pm$ 1.32  | 98.93 $\pm$ 1.41  | 96.56 $\pm$ 0.90  |
| 8 | 20.55 $\pm$ 1.14 | 7.18 $\pm$ 2.50   | 14.94 $\pm$ 1.68 | 35.65 $\pm$ 1.83  | 66.77 $\pm$ 5.15  | 51.11 $\pm$ 3.41  | 28.86 $\pm$ 1.87  | 45.56 $\pm$ 1.22  | 32.32 $\pm$ 1.80  | 66.13 $\pm$ 3.49  |

S18

**Table S2: 50% Inhibitory concentration (IC<sub>50</sub>) data ( $\mu$ M) for compounds A•2Cl, B•2Cl, 8•2Cl and doxorubicin against selected cell lines.**

|     | FaDu                         | SKMEL-2          | HT-29           | HepG2           | Jurkat             | HeLa            |
|-----|------------------------------|------------------|-----------------|-----------------|--------------------|-----------------|
| A   | N/A                          | N/A              | 0.62 $\pm$ 0.08 | 1.29 $\pm$ 0.11 | 8.55 $\pm$ 0.17    | N/A             |
| B   | N/A                          | 9.16 $\pm$ 7.09  | N/A             | N/A             | 5.16 $\pm$ 0.18    | 1.79 $\pm$ 0.08 |
| 8   | 4.81 $\pm$ 0.16              | 12.32 $\pm$ 0.19 | 0.51 $\pm$ 0.26 | N/A             | N/A                | N/A             |
| Dox | 1.88 $\pm$ 0.59 <sup>5</sup> | 3.78 $\pm$ 0.22  | 0.46 $\pm$ 0.07 | 1.16 $\pm$ 0.25 | 0.007 <sup>6</sup> | 1.45 $\pm$ 0.05 |

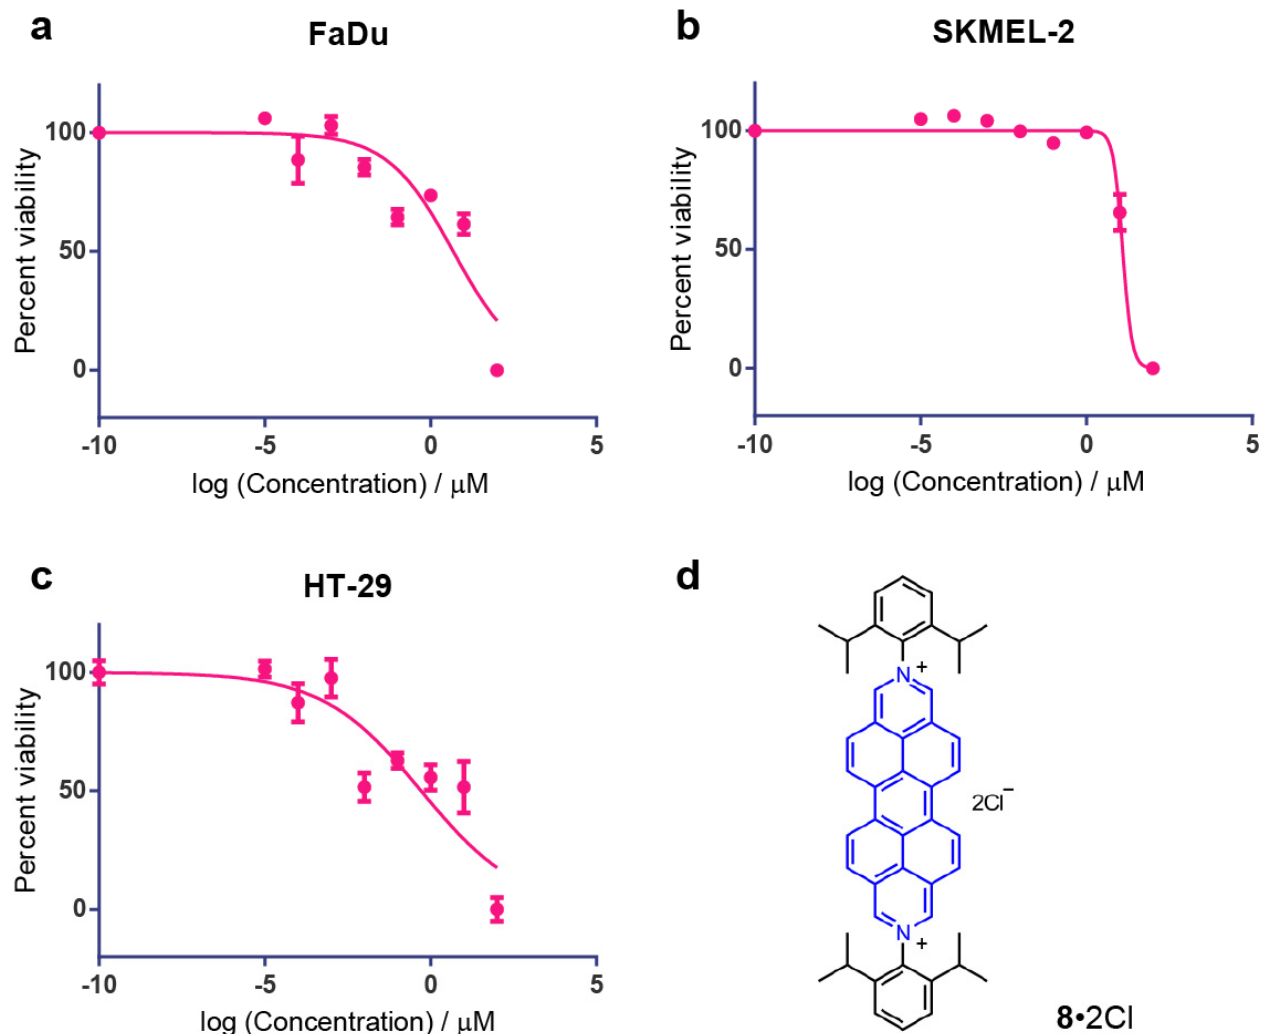

**Figure S17.** 50% Inhibitory concentration plots with **8•2Cl** for (a) FaDu, (b) SKMEL-2, and (c) HT-29 cancer cell lines. (d) Structural formula for **8•2Cl**.

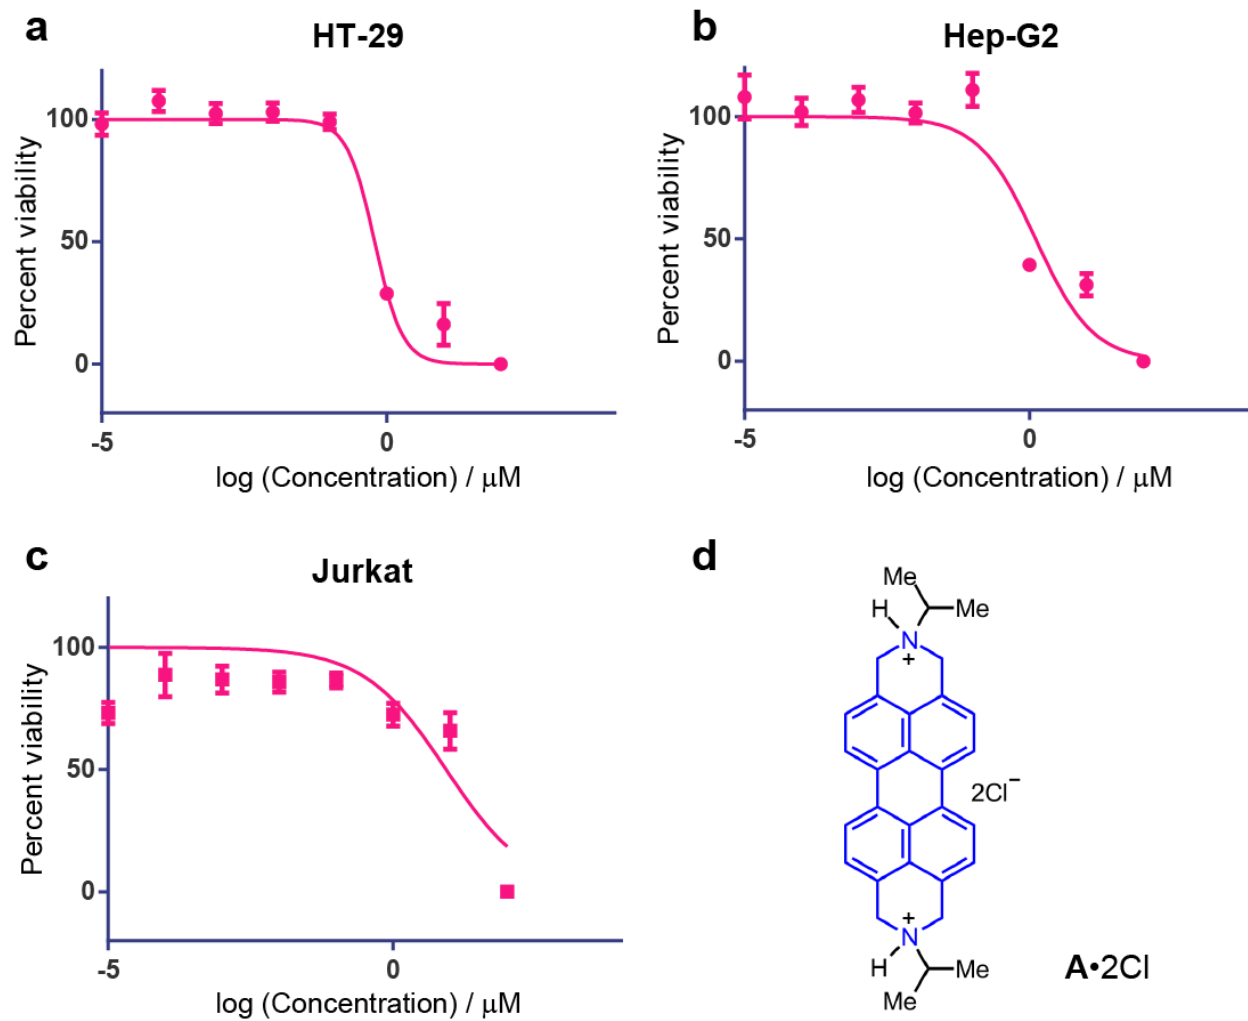

**Figure S18.** 50% Inhibitory concentration plots with **A•2Cl** for (a) HT-29, (b) HepG2, and (c) Jurkat cancer cell lines. (d) Structural formula for **A•2Cl**.

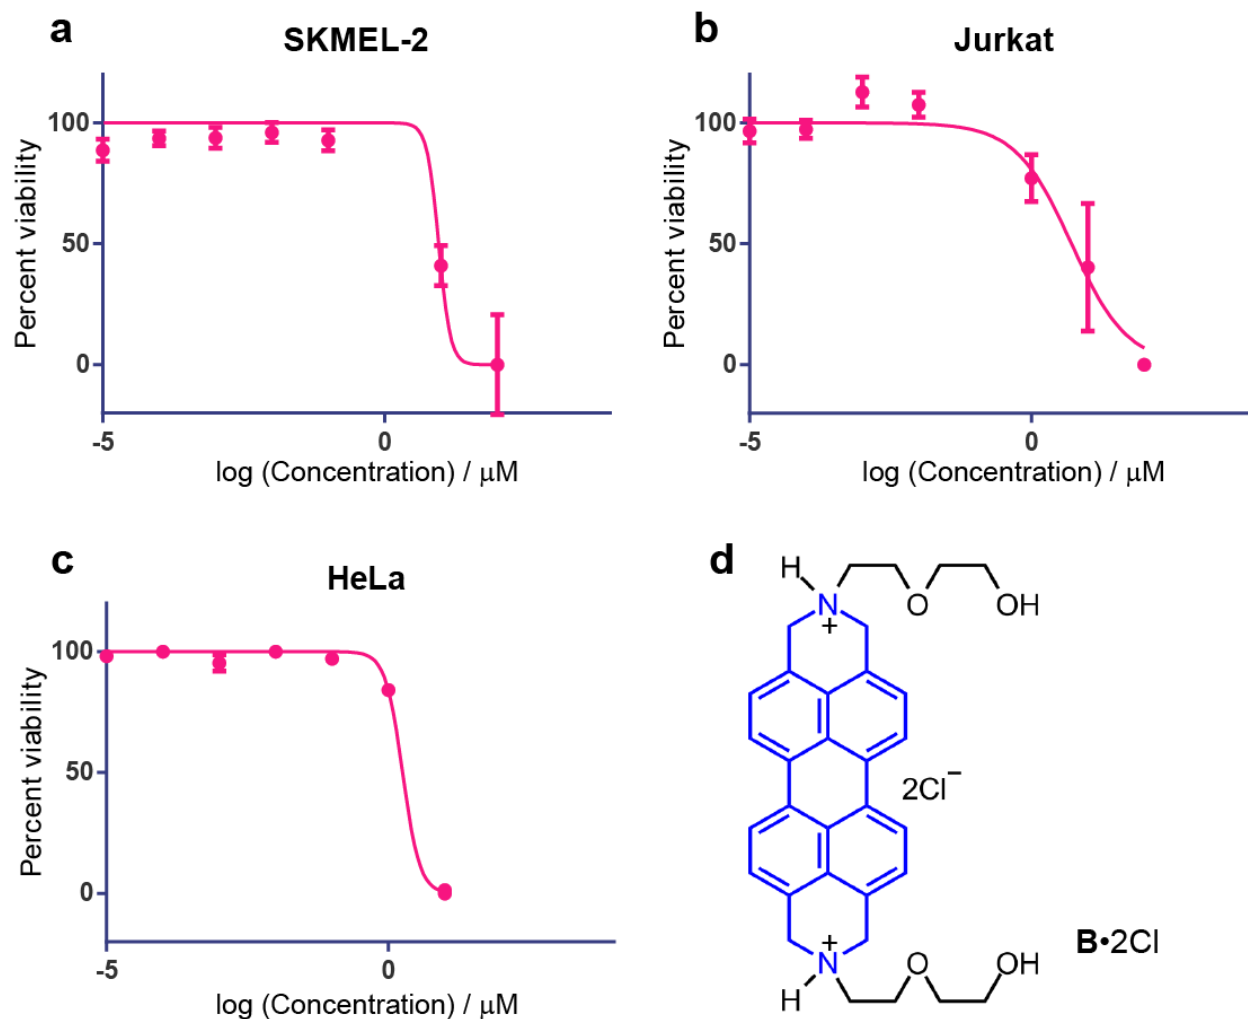

**Figure S19.** 50% Inhibitory concentration plots with **B•2Cl** for (a) SKMEL-2, (b) Jurkat, and (c) HeLa cancer cell lines. (d) Structural formula for **B•2Cl**.

#### S4. Dynamic Light Scattering Data

**Table S3: DI water, no additives**

| Run # | PdI | Diameter Intensity Measurement (nm) | Integrated Intensity Peak Percentage | Intensity FWHM (Intensity) ( $\pm$ nm) | Integrated Volume Peak Percent | Diameter Number Measurement (nm) | Integrated Number Peak Percentage |
|-------|-----|-------------------------------------|--------------------------------------|----------------------------------------|--------------------------------|----------------------------------|-----------------------------------|
| 1     | -   | -                                   | -                                    | -                                      | -                              | -                                | -                                 |
| 2     | -   | -                                   | -                                    | -                                      | -                              | -                                | -                                 |
| 3     | -   | -                                   | -                                    | -                                      | -                              | -                                | -                                 |

No peaks were detected when running the DI water control

**Table S4: pH 7.2 Phosphate Buffer Solution (PBS), no additives**

| Run # | PdI | Diameter Intensity Measurement (nm) | Integrated Intensity Peak Percentage | Intensity FWHM (Intensity) ( $\pm$ nm) | Integrated Volume Peak Percent | Diameter Number Measurement (nm) | Integrated Number Peak Percentage |
|-------|-----|-------------------------------------|--------------------------------------|----------------------------------------|--------------------------------|----------------------------------|-----------------------------------|
| 1     | -   | -                                   | -                                    | -                                      | -                              | -                                | -                                 |
| 2     | -   | -                                   | -                                    | -                                      | -                              | -                                | -                                 |
| 3     | -   | -                                   | -                                    | -                                      | -                              | -                                | -                                 |

No peaks were detected when running the Phosphate Buffer Solution control

**Table S5: RPMI 1640 medium containing 5% fetal bovine serum, no additives**

| Run # | PdI   | Diameter Intensity Measurement (nm) | Integrated Intensity Peak Percentage | Intensity FWHM (Intensity) ( $\pm$ nm) | Integrated Volume Peak Percent | Diameter Number Measurement (nm) | Integrated Number Peak Percentage |
|-------|-------|-------------------------------------|--------------------------------------|----------------------------------------|--------------------------------|----------------------------------|-----------------------------------|
| 1     | 0.342 | 10.42                               | 62.7                                 | 2.033                                  | 99.4                           | 8.718                            | 100                               |
|       |       | 52.00                               | 37.0                                 | 13.03                                  | 0.6                            | -                                | -                                 |
| 2     | 0.366 | 10.59                               | 58.6                                 | 3.470                                  | 99.0                           | 7.106                            | 100                               |
|       |       | 44.16                               | 38.1                                 | 15.16                                  | 1.0                            | -                                | -                                 |
| 3     | 0.376 | 10.17                               | 58.7                                 | 2.222                                  | 99.2                           | 8.034                            | 100                               |
|       |       | 47.79                               | 39.6                                 | 12.63                                  | 0.8                            | -                                | -                                 |

**Table S6: 8•2Cl (10 $\mu$ L, 8mM) added to DI water**

| Run # | PdI   | Diameter Intensity Measurement (nm) | Integrated Intensity Peak Percentage | Intensity FWHM (Intensity) ( $\pm$ nm) | Integrated Volume Peak Percent | Diameter Number Measurement (nm) | Integrated Number Peak Percentage |
|-------|-------|-------------------------------------|--------------------------------------|----------------------------------------|--------------------------------|----------------------------------|-----------------------------------|
| 1     | 0.157 | 196.6                               | 92.0                                 | 33.94                                  | 50.1                           | 182.6                            | 0.8                               |
|       |       | 50.76                               | 8.0                                  | 5.078                                  | 49.9                           | 48.27                            | 99.2                              |
| 2     | 0.217 | 225.5                               | 80.0                                 | 69.33                                  | 48.1                           | -                                | -                                 |
|       |       | 78.48                               | 20.0                                 | 16.18                                  | 51.9                           | 67.23                            | 100                               |
| 3     | 0.213 | 215.0                               | 84.3                                 | 44.08                                  | 45.4                           | 193.1                            | 2.0                               |
|       |       | 62.77                               | 15.7                                 | 8.234                                  | 54.6                           | 57.64                            | 98.0                              |

**Table S7: 8•2Cl (20 $\mu$ L, 8mM) added to DI water**

| Run # | PdI   | Diameter Intensity Measurement (nm) | Integrated Intensity Peak Percentage | Intensity FWHM (Intensity) ( $\pm$ nm) | Integrated Volume Peak Percent       | Diameter Number Measurement (nm) | Integrated Number Peak Percentage |
|-------|-------|-------------------------------------|--------------------------------------|----------------------------------------|--------------------------------------|----------------------------------|-----------------------------------|
| 1     | 0.210 | 209.3                               | 100                                  | 107.5                                  | 49.1% (95.83 nm)<br>50.9% (260.8 nm) | 182.6                            | 100                               |
| 2     | 0.211 | 234.7                               | 73.2                                 | 63.42                                  | 47.3                                 | 201.5                            | 3.4                               |
|       |       | 85.58                               | 26.8                                 | 17.31                                  | 52.7                                 | 72.03                            | 96.6                              |
| 3     | 0.248 | 171.4                               | 89.0                                 | 50.8                                   | 65.8                                 | 128.3                            | 100                               |
|       |       | 1913                                | 11.0                                 | 600.2                                  | 34.2                                 | 1704                             | 0.0                               |

**Table S8: 8•2Cl (30µL, 8mM) added to DI water**

| Run # | PdI   | Diameter Intensity Measurement (nm) | Integrated Intensity Peak Percentage | Intensity FWHM (Intensity) (± nm) | Integrated Volume Peak Percent           | Diameter Number Measurement (nm) | Integrated Number Peak Percentage |
|-------|-------|-------------------------------------|--------------------------------------|-----------------------------------|------------------------------------------|----------------------------------|-----------------------------------|
| 1     | 0.229 | 286.0                               | 61.8                                 | 70.21                             | 44.5                                     | 241.5                            | 3.1                               |
|       |       | 102.5                               | 38.2                                 | 23.96                             | 55.5                                     | 83.97                            | 96.9                              |
| 2     | 0.223 | 232.0                               | 100                                  | 168.3                             | 86.9<br>(174.5 nm)<br>13.1<br>(638.0 nm) | 207.5                            | 100                               |
|       |       | 206.8                               | 78.9                                 | 62.45                             | 48.4                                     | -                                | -                                 |
| 3     | 0.235 | 80.96                               | 21.1                                 | 15.27                             | 51.6                                     | 73.85                            | 100                               |

**Table S9: 8•2Cl (30µL, 8mM) added to DI water approximately 4 hours after addition**

| Run # | PdI   | Diameter Intensity Measurement (nm) | Integrated Intensity Peak Percentage | Intensity FWHM (Intensity) (± nm) | Integrated Volume Peak Percent | Diameter Number Measurement (nm) | Integrated Number Peak Percentage |
|-------|-------|-------------------------------------|--------------------------------------|-----------------------------------|--------------------------------|----------------------------------|-----------------------------------|
| 1     | 0.190 | 222.1                               | 89.9                                 | 49.11                             | 55.2                           | 195.7                            | 2.5                               |
|       |       | 59.85                               | 10.1                                 | 7.441                             | 44.8                           | 55.75                            | 97.5                              |

**Table S10: 8•2Cl (10µL, 8mM) added to pH 7.2 Phosphate Buffer**

| Run # | PdI   | Diameter Intensity Measurement (nm) | Integrated Intensity Peak Percentage | Intensity FWHM (Intensity) (± nm) | Integrated Volume Peak Percent | Diameter Number Measurement (nm) | Integrated Number Peak Percentage |
|-------|-------|-------------------------------------|--------------------------------------|-----------------------------------|--------------------------------|----------------------------------|-----------------------------------|
| 1     | 0.287 | 287.4                               | 61.8                                 | 66.11                             | 44.5                           | 250.8                            | 98.6                              |
|       |       | 1242                                | 38.2                                 | 310.6                             | 55.5                           | 1095                             | 1.4                               |
| 2     | 0.325 | 463.3                               | 76.1                                 | 93.23                             | 79.3                           | 423.1                            | 18.8                              |
|       |       | 179.1                               | 23.9                                 | 26.25                             | 20.7                           | 173.9                            | 81.2                              |
| 3     | 0.308 | 347.0                               | 78.6                                 | 72.74                             | 13.2                           | 309.7                            | 99.7                              |
|       |       | 3851                                | 21.4                                 | 874.1                             | 86.8                           | 3845                             | 0.3                               |

**Table S11: 8•2Cl (20µL, 8mM) added to pH 7.2 Phosphate Buffer**

| Run # | PdI   | Diameter Intensity Measurement (nm) | Integrated Intensity Peak Percentage | Intensity FWHM (Intensity) (± nm) | Integrated Volume Peak Percent | Diameter Number Measurement (nm) | Integrated Number Peak Percentage |
|-------|-------|-------------------------------------|--------------------------------------|-----------------------------------|--------------------------------|----------------------------------|-----------------------------------|
| 1     | 0.324 | 278.8                               | 66.4                                 | 78.64                             | 55.2                           | 235.7                            | 97.9                              |
|       |       | 935.6                               | 33.6                                 | 260.8                             | 44.8                           | 780.6                            | 2.1                               |
| 2     | 0.261 | 500.6                               | 69.7                                 | 125.2                             | 77.7                           | 457.4                            | 14.8                              |
|       |       | 209.7                               | 30.3                                 | 46.39                             | 22.3                           | 192.5                            | 85.2                              |
| 3     | 0.238 | 426.3                               | 91.7                                 | 87.02                             | 91.9                           | 382.2                            | 25.6                              |
|       |       | 130.5                               | 8.3                                  | 15.72                             | 8.1                            | 123.5                            | 74.4                              |

**Table S12: 8•2Cl (20µL, 8mM) added to pH 7.2 Phosphate Buffer approximately 4 hours after addition**

| Run # | PdI   | Diameter Intensity Measurement (nm) | Integrated Intensity Peak Percentage | Intensity FWHM (Intensity) (± nm) | Integrated Volume Peak Percent | Diameter Number Measurement (nm) | Integrated Number Peak Percentage |
|-------|-------|-------------------------------------|--------------------------------------|-----------------------------------|--------------------------------|----------------------------------|-----------------------------------|
| 1     | 0.527 | 466.8                               | 100                                  | 22.89                             | 100                            | 467.0                            | 100                               |

**Table S13: 8•2Cl (10µL, 8mM) added to RPMI 1640 medium containing 5% fetal bovine serum**

| Run # | PdI   | Diameter Intensity Measurement (nm) | Integrated Intensity Peak Percentage | Intensity FWHM (Intensity) (± nm) | Integrated Volume Peak Percent | Diameter Number Measurement (nm) | Integrated Number Peak Percentage |
|-------|-------|-------------------------------------|--------------------------------------|-----------------------------------|--------------------------------|----------------------------------|-----------------------------------|
| 1     | 0.979 | 241.5                               | 55.6                                 | 94.26                             | 0.1                            | -                                | -                                 |
|       |       | 10.47                               | 25.1                                 | 2.931                             | 98.3                           | 7.624                            | 100                               |
|       |       | 39.20                               | 19.20                                | 10.30                             | 1.5                            | -                                | -                                 |
| 2     | 0.975 | 230.0                               | 57.4                                 | 72.71                             | 0.1                            | -                                | -                                 |
|       |       | 31.95                               | 21.4                                 | 6.366                             | 2.6                            | 26.08                            | 0.1                               |
|       |       | 9.041                               | 21.2                                 | 1.270                             | 97.3                           | 8.197                            | 99.9                              |
| 3     | 0.950 | 240.3                               | 55.1                                 | 71.30                             | 0.1                            | -                                | -                                 |
|       |       | 9.600                               | 23.1                                 | 1.5555                            | 97.6                           | 8.500                            | 99.9                              |
|       |       | 34.53                               | 21.3                                 | 7.970                             | 2.3                            | 26.53                            | 0.1                               |

**Table S14: 8•2Cl (20µL, 8mM) added to RPMI 1640 medium containing 5% fetal bovine serum**

| Run # | PdI   | Diameter Intensity Measurement (nm) | Integrated Intensity Peak Percentage | Intensity FWHM (Intensity) (± nm) | Integrated Volume Peak Percent | Diameter Number Measurement (nm) | Integrated Number Peak Percentage |
|-------|-------|-------------------------------------|--------------------------------------|-----------------------------------|--------------------------------|----------------------------------|-----------------------------------|
| 1     | 0.674 | 350.8                               | 76.5                                 | 257.2                             | 0.4                            | -                                | -                                 |
|       |       | 9.700                               | 12.0                                 | 1.342                             | 98.3                           | 8.762                            | 100                               |
|       |       | 45.00                               | 11.6                                 | 10.84                             | 1.2                            | 34.74                            | -                                 |
| 2     | 0.676 | 348.9                               | 78.3                                 | 140.6                             | 0.5                            | -                                | -                                 |
|       |       | 37.65                               | 10.8                                 | 7.769                             | 1.9                            | 30.39                            | -                                 |
|       |       | 9.601                               | 10.8                                 | 1.421                             | 97.6                           | 8.601                            | 100                               |
| 3     | 0.348 | 343.2                               | 71.2                                 | 80.11                             | 0.4                            | -                                | -                                 |
|       |       | 30.59                               | 12.0                                 | 5.770                             | 3.2                            | 25.48                            | 0.1                               |
|       |       | 8.674                               | 9.0                                  | 1.260                             | 96.3                           | 7.766                            | 99.9                              |



**Table S15: 8•2Cl (30µL, 8mM) added to RPMI 1640 medium containing 5% fetal bovine serum**

| Run # | PdI   | Diameter Intensity Measurement (nm) | Integrated Intensity Peak Percentage | Intensity FWHM (Intensity) (± nm) | Integrated Volume Peak Percent | Diameter Number Measurement (nm) | Integrated Number Peak Percentage |
|-------|-------|-------------------------------------|--------------------------------------|-----------------------------------|--------------------------------|----------------------------------|-----------------------------------|
| 1     | 0.653 | 287.7                               | 71.1                                 | 69.45                             | 0.5                            | -                                | -                                 |
|       |       | 53.42                               | 17.9                                 | 9.75                              | 1.2                            | 45.28                            | -                                 |
|       |       | 9.948                               | 11.0                                 | 1.05                              | 98.3                           | 9.428                            | 100                               |
| 2     | 0.735 | 252.7                               | 77.3                                 | 49.25                             | 0.4                            | -                                | -                                 |
|       |       | 35.51                               | 13.8                                 | 4.843                             | 2.3                            | 32.20                            | -                                 |
|       |       | 8.565                               | 8.9                                  | 0.8792                            | 97.3                           | 8.141                            | 100                               |
| 3     | 0.711 | 279.8                               | 76.6                                 | 68.97                             | 0.4                            | -                                | -                                 |
|       |       | 46.54                               | 13.7                                 | 8.736                             | 1.2                            | 39.02                            | -                                 |
|       |       | 9.328                               | 9.7                                  | 1.599                             | 98.4                           | 8.03                             | 100                               |

**Table S16: 8•2Cl (30µL, 8mM) added to RPMI 1640 medium containing 5% fetal bovine serum approximately 4 hours after addition**

| Run # | PdI   | Diameter Intensity Measurement (nm) | Integrated Intensity Peak Percentage | Intensity FWHM (Intensity) (± nm) | Integrated Volume Peak Percent | Diameter Number Measurement (nm) | Integrated Number Peak Percentage |
|-------|-------|-------------------------------------|--------------------------------------|-----------------------------------|--------------------------------|----------------------------------|-----------------------------------|
| 1     | 0.644 | 199.0                               | 80.2                                 | 44.9                              | 0.4                            | -                                | -                                 |
|       |       | 25.18                               | 11.3                                 | 3.769                             | 5.8                            | 22.27                            | 0.3                               |
|       |       | 8.782                               | 8.5                                  | 0.9901                            | 93.8                           | 8.242                            | 99.7                              |

**Table S17: 1•2Cl (10µL, 4mM) added to DI water**

| Run # | PdI   | Diameter Intensity Measurement (nm) | Integrated Intensity Peak Percentage | Intensity FWHM (Intensity) (± nm) | Integrated Volume Peak Percent | Diameter Number Measurement (nm) | Integrated Number Peak Percentage |
|-------|-------|-------------------------------------|--------------------------------------|-----------------------------------|--------------------------------|----------------------------------|-----------------------------------|
| 1     | 0.583 | 464.9                               | 100                                  | 75.82                             | 100                            | 435.4                            | 100                               |
| 2     | 0.429 | 702.8                               | 92.4                                 | 163.7                             | 94.8                           | 618.9                            | 19.1                              |
|       |       | 158.3                               | 7.6                                  | 20.85                             | 5.2                            | 149.8                            | 80.9                              |
| 3     | 0.248 | 728.4                               | 100                                  | 159.7                             | 100                            | 651.8                            | 100                               |

**Table S18: 1•2Cl (20µL, 4mM) added to DI water**

| Run # | PdI   | Diameter Intensity Measurement (nm) | Integrated Intensity Peak Percentage | Intensity FWHM (Intensity) (± nm) | Integrated Volume Peak Percent | Diameter Number Measurement (nm) | Integrated Number Peak Percentage |
|-------|-------|-------------------------------------|--------------------------------------|-----------------------------------|--------------------------------|----------------------------------|-----------------------------------|
| 1     | 0.607 | 768.5                               | 64.1                                 | 98.59                             | 66.4                           | 738.6                            | 0.6                               |
|       |       | 113.6                               | 35.9                                 | 8.942                             | 33.6                           | 111.3                            | 99.4                              |
| 2     | 0.439 | 530.9                               | 100                                  | 93.77                             | 100                            | 494                              | 100                               |
| 3     | 0.607 | 431.9                               | 100                                  | 98.13                             | 100                            | 377.0                            | 100                               |

**Table S19: 1•2Cl (20µL, 4mM) added to DI water approximately 4 hours after addition**

| Run # | PdI  | Diameter Intensity Measurement (nm) | Integrated Intensity Peak Percentage | Intensity FWHM (Intensity) (± nm) | Integrated Volume Peak Percent | Diameter Number Measurement (nm) | Integrated Number Peak Percentage |
|-------|------|-------------------------------------|--------------------------------------|-----------------------------------|--------------------------------|----------------------------------|-----------------------------------|
| 1     | 1.00 | 894.8                               | 100                                  | 125.2                             | 100                            | 853.8                            | 100                               |

**Table S20: 1•2Cl (10µL, 4mM) added to Phosphate Buffer Solution**

| Run # | PdI   | Diameter Intensity Measurement (nm) | Integrated Intensity Peak Percentage | Intensity FWHM (Intensity) (± nm) | Integrated Volume Peak Percent | Diameter Number Measurement (nm) | Integrated Number Peak Percentage |
|-------|-------|-------------------------------------|--------------------------------------|-----------------------------------|--------------------------------|----------------------------------|-----------------------------------|
| 1     | 0.541 | 288.3                               | 100                                  | 15.32                             | 100                            | 286.8                            | 100                               |

**Table S21: 1•2Cl (10µL, 4mM) added to RPMI 1640 medium containing 5% fetal bovine serum**

| Run # | PdI   | Diameter Intensity Measurement (nm) | Integrated Intensity Peak Percentage | Intensity FWHM (Intensity) (± nm) | Integrated Volume Peak Percent | Diameter Number Measurement (nm) | Integrated Number Peak Percentage |
|-------|-------|-------------------------------------|--------------------------------------|-----------------------------------|--------------------------------|----------------------------------|-----------------------------------|
| 1     | 0.516 | 35.70                               | 48.9                                 | 8.613                             | 2.4                            | 26.82                            | 0.1                               |
|       |       | 8.793                               | 37.2                                 | 1.398                             | 97.6                           | 7.71                             | 99.9                              |
|       |       | 230.7                               | 13.8                                 | 54.08                             | 0.0                            | -                                | -                                 |
| 2     | 1.000 | 38.27                               | 50.2                                 | 11.67                             | 1.9                            | -                                | -                                 |
|       |       | 9.163                               | 35.9                                 | 2.426                             | 97.6                           | 8.178                            | 100                               |
|       |       | 414.3                               | 14.3                                 | 76.28                             | 0.0                            | -                                | -                                 |
| 3     | 1.000 | 29.84                               | 44.6                                 | 7.593                             | 2.1                            | -                                | -                                 |
|       |       | 8.793                               | 35.3                                 | 1.398                             | 97.6                           | 7.126                            | 100                               |
|       |       | 192.6                               | 20.1                                 | 24.67                             | 0.0                            | -                                | -                                 |

**Table S22: 1•2Cl (20µL, 4mM) added to RPMI 1640 medium containing 5% fetal bovine serum**

| Run # | PdI   | Diameter Intensity Measurement (nm) | Integrated Intensity Peak Percentage | Intensity FWHM (Intensity) (± nm) | Integrated Volume Peak Percent | Diameter Number Measurement (nm) | Integrated Number Peak Percentage |
|-------|-------|-------------------------------------|--------------------------------------|-----------------------------------|--------------------------------|----------------------------------|-----------------------------------|
| 1     | 0.275 | 180.9                               | 36.7                                 | 31.47                             | 0.1                            | -                                | -                                 |
|       |       | 30.86                               | 33.6                                 | 5.649                             | 2.8                            | 25.85                            | 0.1                               |
|       |       | 8.835                               | 29.6                                 | 1.322                             | 97.1                           | 7.853                            | 99.9                              |
| 2     | 0.309 | 178.3                               | 43.7                                 | 21.97                             | 0.1                            | -                                | -                                 |
|       |       | 25.00                               | 33.1                                 | 3.741                             | 4.5                            | 22.09                            | 0.1                               |
|       |       | 7.916                               | 23.3                                 | 1.071                             | 95.4                           | 7.239                            | 99.9                              |
| 3     | 0.607 | 41.35                               | 42.2                                 | 14.05                             | 2.2                            | 27.03                            | -                                 |
|       |       | 9.116                               | 29.5                                 | 1.649                             | 97.7                           | 7.748                            | 100                               |
|       |       | 299.3                               | 28.3                                 | 80.37                             | 0.1                            | -                                | -                                 |

**Table S23: 1•2Cl (20µL, 4mM) added to RPMI 1640 medium containing 5% fetal bovine serum approximately 4 hours after addition**

| Run # | PdI   | Diameter Intensity Measurement (nm) | Integrated Intensity Peak Percentage | Intensity FWHM (Intensity) (± nm) | Integrated Volume Peak Percent | Diameter Number Measurement (nm) | Integrated Number Peak Percentage |
|-------|-------|-------------------------------------|--------------------------------------|-----------------------------------|--------------------------------|----------------------------------|-----------------------------------|
| 1     | 0.248 | 154.7                               | 40.4                                 | 41.38                             | 0.1                            | -                                | -                                 |
|       |       | 30.21                               | 34.1                                 | 7.318                             | 4.0                            | 21.91                            | 0.2                               |
|       |       | 8.923                               | 25.5                                 | 1.631                             | 95.9                           | 7.594                            | 99.8                              |

**Table S24: 3•2Cl (10µL, 4mM) added to DI water**

| Run # | PdI   | Diameter Intensity Measurement (nm) | Integrated Intensity Peak Percentage | Intensity FWHM (Intensity) (± nm) | Integrated Volume Peak Percent | Diameter Number Measurement (nm) | Integrated Number Peak Percentage |
|-------|-------|-------------------------------------|--------------------------------------|-----------------------------------|--------------------------------|----------------------------------|-----------------------------------|
| 1     | 0.639 | 545.1                               | 98.7                                 | 41.93                             | 59.0                           | 541.6                            | 99.9                              |
|       |       | 5560                                | 1.3                                  | 579.8                             | 41.0                           | 5590                             | 0.1                               |
| 2     | 1.000 | 318.2                               | 100                                  | 23.34                             | 100                            | 315.8                            | 100                               |
| 3     | 1.000 | 508.1                               | 100                                  | 44.18                             | 100                            | 502.2                            | 100                               |

**Table S25: 3•2Cl (20µL, 4mM) added to DI water**

| Run # | PdI   | Diameter Intensity Measurement (nm) | Integrated Intensity Peak Percentage | Intensity FWHM (Intensity) (± nm) | Integrated Volume Peak Percent | Diameter Number Measurement (nm) | Integrated Number Peak Percentage |
|-------|-------|-------------------------------------|--------------------------------------|-----------------------------------|--------------------------------|----------------------------------|-----------------------------------|
| 1     | 1.000 | 505.5                               | 100                                  | 53.93                             | 100                            | 494.9                            | 100                               |
| 2     | 1.000 | 413.8                               | 100                                  | 28.21                             | 100                            | 411.0                            | 100                               |
| 3     | 1.000 | 454.3                               | 100                                  | 15.87                             | 100                            | 454.7                            | 100                               |

**Table S26: 3•2Cl (30µL, 4mM) added to DI water**

| Run # | PdI   | Diameter Intensity Measurement (nm) | Integrated Intensity Peak Percentage | Intensity FWHM (Intensity) (± nm) | Integrated Volume Peak Percent | Diameter Number Measurement (nm) | Integrated Number Peak Percentage |
|-------|-------|-------------------------------------|--------------------------------------|-----------------------------------|--------------------------------|----------------------------------|-----------------------------------|
| 1     | 1.000 | 172.1                               | 100                                  | 11.97                             | 100                            | 171.5                            | 100                               |
| 2     | 1.000 | 448.1                               | 100                                  | 23.41                             | 100                            | 466.2                            | 100                               |
| 3     | 0.995 | 573.4                               | 100                                  | 41.98                             | 100                            | 570.9                            | 100                               |

**Table S27: 3•2Cl (30µL, 4mM) added to DI water approximately 4 hours after addition**

| Run # | PdI   | Diameter Intensity Measurement (nm) | Integrated Intensity Peak Percentage | Intensity FWHM (Intensity) (± nm) | Integrated Volume Peak Percent | Diameter Number Measurement (nm) | Integrated Number Peak Percentage |
|-------|-------|-------------------------------------|--------------------------------------|-----------------------------------|--------------------------------|----------------------------------|-----------------------------------|
| 1     | 0.670 | 471.2                               | 100                                  | 36.94                             | 100                            | 466.2                            | 100                               |

**Table S28: 3•2Cl (10µL, 4mM) added to Phosphate Buffer Solution (80 µM)**

| Run # | PdI   | Diameter Intensity Measurement (nm) | Integrated Intensity Peak Percentage | Intensity FWHM (Intensity) (± nm) | Integrated Volume Peak Percent | Diameter Number Measurement (nm) | Integrated Number Peak Percentage |
|-------|-------|-------------------------------------|--------------------------------------|-----------------------------------|--------------------------------|----------------------------------|-----------------------------------|
| 1     | 1.000 | 421.9                               | 100                                  | 32.80                             | 100                            | 416.6                            | 100                               |
| 2     | 1.000 | 505.1                               | 100                                  | 45.78                             | 100                            | 498.2                            | 100                               |
| 3     | 0.614 | 1113                                | 91.2                                 | 182.9                             | 94.9                           | 1055                             | 12.7                              |
|       |       | 218.5                               | 8.8                                  | 22.52                             | 5.1                            | 213.0                            | 87.3                              |

**Table S29: 3•2Cl (10µL, 4mM) added to Phosphate Buffer Solution (80 µM) approximately 4 hours after addition**

| Run # | PdI   | Diameter Intensity Measurement (nm) | Integrated Intensity Peak Percentage | Intensity FWHM (Intensity) (± nm) | Integrated Volume Peak Percent | Diameter Number Measurement (nm) | Integrated Number Peak Percentage |
|-------|-------|-------------------------------------|--------------------------------------|-----------------------------------|--------------------------------|----------------------------------|-----------------------------------|
| 1     | 1.000 | 347.4                               | 100                                  | 16.28                             | 100                            | 347.5                            | 100                               |

**Table S30: 3•2Cl (10µL, 4mM) added to RPMI 1640 medium containing 5% fetal bovine serum**

| Run # | PdI   | Diameter Intensity Measurement (nm) | Integrated Intensity Peak Percentage | Intensity FWHM (Intensity) (± nm) | Integrated Volume Peak Percent | Diameter Number Measurement (nm) | Integrated Number Peak Percentage |
|-------|-------|-------------------------------------|--------------------------------------|-----------------------------------|--------------------------------|----------------------------------|-----------------------------------|
| 1     | 0.868 | 17.56                               | 38.8                                 | 1.573                             | 6.5                            | 16.90                            | 0.3                               |
|       |       | 342.0                               | 35.9                                 | 0.000                             | 0                              | -                                | -                                 |
|       |       | 6.232                               | 25.3                                 | 0.5506                            | 93.5                           | 6.006                            | 99.7                              |
| 2     | 0.235 | 8.529                               | 40.7                                 | 1.392                             | 97.9                           | 7.48                             | 99.9                              |
|       |       | 30.96                               | 38.9                                 | 5.858                             | 2.1                            | 25.64                            | 0.1                               |
|       |       | 338.7                               | 20.4                                 | 54.43                             | 0.0                            | -                                | -                                 |
| 3     | 0.650 | 22.03                               | 41.0                                 | 2.545                             | 4.3                            | 20.50                            | 0.2                               |
|       |       | 7.324                               | 34.4                                 | 0.7894                            | 95.7                           | 6.92                             | 99.8                              |
|       |       | 226.5                               | 24.6                                 | 13.41                             | 0.0                            | -                                | -                                 |

**Table S31: 3•2Cl (20µL, 4mM) added to RPMI 1640 medium containing 5% fetal bovine serum**

| Run # | PdI   | Diameter Intensity Measurement (nm) | Integrated Intensity Peak Percentage | Intensity FWHM (Intensity) (± nm) | Integrated Volume Peak Percent | Diameter Number Measurement (nm) | Integrated Number Peak Percentage |
|-------|-------|-------------------------------------|--------------------------------------|-----------------------------------|--------------------------------|----------------------------------|-----------------------------------|
| 1     | 0.627 | 399.4                               | 39.7                                 | 39.09                             | 0.1                            | -                                | -                                 |
|       |       | 8.360                               | 30.6                                 | 1.169                             | 97.8                           | 7.531                            | 100                               |
|       |       | 30.33                               | 29.6                                 | 4.102                             | 2.0                            | 27.59                            | -                                 |
| 2     | 0.489 | 18.0                                | 36.0                                 | 3.705                             | 8.1                            | 14.44                            | 0.5                               |
|       |       | 540.2                               | 31.1                                 | 57.84                             | 0.0                            | -                                | -                                 |
|       |       | 6.107                               | 18.2                                 | 0.8459                            | 91.7                           | 5.524                            | 99.5                              |
| 3     | 0.520 | 9.569                               | 40.5                                 | 2.4765                            | 99.0                           | 6.528                            | 100                               |
|       |       | 414.1                               | 30.7                                 | 39.29                             | 0.0                            | -                                | -                                 |
|       |       | 36.00                               | 28.8                                 | 4.966                             | 1.0                            | -                                | -                                 |

**Table S32: 3•2Cl (20µL, 4mM) added to RPMI 1640 medium containing 5% fetal bovine serum approximately 4 hours after addition**

| Run # | PdI   | Diameter Intensity Measurement (nm) | Integrated Intensity Peak Percentage | Intensity FWHM (Intensity) (± nm) | Integrated Volume Peak Percent | Diameter Number Measurement (nm) | Integrated Number Peak Percentage |
|-------|-------|-------------------------------------|--------------------------------------|-----------------------------------|--------------------------------|----------------------------------|-----------------------------------|
| 1     | 0.527 | 281.5                               | 44.0                                 | 19.12                             | 0.0                            | -                                | -                                 |
|       |       | 18.19                               | 39.6                                 | 1.952                             | 6.7                            | 17.15                            | 0.2                               |
|       |       | 5.594                               | 16.4                                 | 0.5863                            | 93.3                           | 5.293                            | 99.8                              |

**Table S33: 5•2Cl (10µL, 8mM) added to DI water**

| Run # | PdI | Diameter Intensity Measurement (nm) | Integrated Intensity Peak Percentage | Intensity FWHM (Intensity) (± nm) | Integrated Volume Peak Percent | Diameter Number Measurement (nm) | Integrated Number Peak Percentage |
|-------|-----|-------------------------------------|--------------------------------------|-----------------------------------|--------------------------------|----------------------------------|-----------------------------------|
| 1     | -   | -                                   | -                                    | -                                 | -                              | -                                | -                                 |
| 2     | -   | -                                   | -                                    | -                                 | -                              | -                                | -                                 |
| 3     | -   | -                                   | -                                    | -                                 | -                              | -                                | -                                 |

No peaks observed for PEG-DAPP at this concentration in DI water

**Table S34: 5•2Cl (20µL, 8mM) added to DI water**

| Run # | PdI | Diameter Intensity Measurement (nm) | Integrated Intensity Peak Percentage | Intensity FWHM (Intensity) (± nm) | Integrated Volume Peak Percent | Diameter Number Measurement (nm) | Integrated Number Peak Percentage |
|-------|-----|-------------------------------------|--------------------------------------|-----------------------------------|--------------------------------|----------------------------------|-----------------------------------|
| 1     | -   | -                                   | -                                    | -                                 | -                              | -                                | -                                 |
| 2     | -   | -                                   | -                                    | -                                 | -                              | -                                | -                                 |
| 3     | -   | -                                   | -                                    | -                                 | -                              | -                                | -                                 |

No peaks observed for PEG-DAPP at this concentration in DI water

**Table S35: 5•2Cl (30µL, 8mM) added to DI water**

| Run # | PdI | Diameter Intensity Measurement (nm) | Integrated Intensity Peak Percentage | Intensity FWHM (Intensity) (± nm) | Integrated Volume Peak Percent | Diameter Number Measurement (nm) | Integrated Number Peak Percentage |
|-------|-----|-------------------------------------|--------------------------------------|-----------------------------------|--------------------------------|----------------------------------|-----------------------------------|
| 1     | -   | -                                   | -                                    | -                                 | -                              | -                                | -                                 |
| 2     | -   | -                                   | -                                    | -                                 | -                              | -                                | -                                 |
| 3     | -   | -                                   | -                                    | -                                 | -                              | -                                | -                                 |

No peaks observed for PEG-DAPP at this concentration in DI water

**Table S36: 5•2Cl (30µL, 8mM) added to DI water approximately 4 hours after addition**

| Run # | PdI | Diameter Intensity Measurement (nm) | Integrated Intensity Peak Percentage | Intensity FWHM (Intensity) (± nm) | Integrated Volume Peak Percent | Diameter Number Measurement (nm) | Integrated Number Peak Percentage |
|-------|-----|-------------------------------------|--------------------------------------|-----------------------------------|--------------------------------|----------------------------------|-----------------------------------|
| 1     | -   | -                                   | -                                    | -                                 | -                              | -                                | -                                 |

No peaks observed for PEG-DAPP at this concentration in DI water

**Table S37: 5•2Cl (10µL, 8mM) added to pH 7.2 Phosphate Buffer Solution**

| Run # | PdI | Diameter Intensity Measurement (nm) | Integrated Intensity Peak Percentage | Intensity FWHM (Intensity) (± nm) | Integrated Volume Peak Percent | Diameter Number Measurement (nm) | Integrated Number Peak Percentage |
|-------|-----|-------------------------------------|--------------------------------------|-----------------------------------|--------------------------------|----------------------------------|-----------------------------------|
| 1     | -   | -                                   | -                                    | -                                 | -                              | -                                | -                                 |
| 2     | -   | -                                   | -                                    | -                                 | -                              | -                                | -                                 |
| 3     | -   | -                                   | -                                    | -                                 | -                              | -                                | -                                 |

No peaks observed for PEG-DAPP at this concentration in PBS water

**Table S38: 5•2Cl (20µL, 8mM) added to pH 7.2 Phosphate Buffer Solution**

| Run # | PdI   | Diameter Intensity Measurement (nm) | Integrated Intensity Peak Percentage | Intensity FWHM (Intensity) (± nm) | Integrated Volume Peak Percent   | Diameter Number Measurement (nm) | Integrated Number Peak Percentage |
|-------|-------|-------------------------------------|--------------------------------------|-----------------------------------|----------------------------------|----------------------------------|-----------------------------------|
| 1     | 0.382 | 232.7                               | 89.7                                 | 108.4                             | 23.4                             | 126.8                            | 100                               |
|       |       | 4076                                | 10.3                                 | 1056                              | 76.6                             | -                                | -                                 |
| 2     | 0.300 | 279.2                               | 94.5                                 | 184.6                             | 13.6                             | 104.9                            | 100                               |
|       |       |                                     |                                      |                                   | (106.0 nm)<br>30.2<br>(346.6 nm) |                                  |                                   |
| 3     | 0.262 | 3862                                | 5.5                                  | 1131                              | 56.2                             | -                                | -                                 |
|       |       | 324.5                               | 98.5                                 | 223.4                             | 67.4                             | 112.2                            | 100                               |
|       |       | 4406                                | 1.5                                  | 899.0                             | 32.6                             | -                                | -                                 |

**Table S39: 5•2Cl (30µL, 8mM) added to pH 7.2 Phosphate Buffer Solution**

| Run # | PdI   | Diameter Intensity Measurement (nm) | Integrated Intensity Peak Percentage | Intensity FWHM (Intensity) (± nm) | Integrated Volume Peak Percent                | Diameter Number Measurement (nm) | Integrated Number Peak Percentage |
|-------|-------|-------------------------------------|--------------------------------------|-----------------------------------|-----------------------------------------------|----------------------------------|-----------------------------------|
| 1     | 0.384 | 401                                 | 97.7                                 | 264.3                             | 3 peaks<br>105.7 nm,<br>294.9 nm,<br>726.4 nm | 110.9                            | 100                               |
|       |       | 4865                                | 2.3                                  | 695.2                             | 44.6                                          | -                                | -                                 |
| 2     | 0.331 | 232.8                               | 50.9                                 | 85.49                             | 36.3                                          | 161.9                            | 100                               |
|       |       | 817.6                               | 49.1                                 | 370.5                             | 63.7                                          | -                                | -                                 |
| 3     | 0.363 | 898.9                               | 54.8                                 | 423.6                             | 62.0                                          | 180.9                            | 100                               |
|       |       | 238.7                               | 45.2                                 | 82.58                             | 33.0                                          | -                                | -                                 |

**Table S40: 5•2Cl (30µL, 8mM) added to pH 7.2 Phosphate Buffer Solution approximately 4 hours after addition**

| Run # | PdI  | Diameter Intensity Measurement (nm) | Integrated Intensity Peak Percentage | Intensity FWHM (Intensity) (± nm) | Integrated Volume Peak Percent | Diameter Number Measurement (nm) | Integrated Number Peak Percentage |
|-------|------|-------------------------------------|--------------------------------------|-----------------------------------|--------------------------------|----------------------------------|-----------------------------------|
| 1     | 1.00 | 946.9                               | 100                                  | 203.9                             | 100                            | 849.7                            | 100                               |

**Table S41: 5•2Cl (10µL, 8mM) added to RPMI 1640 medium containing 5% fetal bovine serum**

| Run # | PdI   | Diameter Intensity Measurement (nm) | Integrated Intensity Peak Percentage | Intensity FWHM (Intensity) (± nm) | Integrated Volume Peak Percent | Diameter Number Measurement (nm) | Integrated Number Peak Percentage |
|-------|-------|-------------------------------------|--------------------------------------|-----------------------------------|--------------------------------|----------------------------------|-----------------------------------|
| 1     | 0.657 | 361.4                               | 37.5                                 | 181.4                             | 0.2                            | -                                | -                                 |
|       |       | 14.03                               | 32.8                                 | 3.937                             | 98.2                           | 10.53                            | 100                               |
|       |       | 64.77                               | 28.2                                 | 24.32                             | 1.4                            | -                                | -                                 |
| 2     | 0.237 | 146.2                               | 49.9                                 | 32.53                             | -                              | -                                | -                                 |
|       |       | 23.33                               | 31.9                                 | 6.072                             | 0.1                            | -                                | -                                 |
|       |       | 9.592                               | 18.2                                 | 2.074                             | 99.0                           | 7.808                            | 100                               |
| 3     | 0.822 | 84.69                               | 37.2                                 | 33.11                             | 0.8                            | -                                | -                                 |
|       |       | 13.00                               | 31.5                                 | 2.654                             | 99.0                           | 10.62                            | 100                               |
|       |       | 665.5                               | 31.3                                 | 373.7                             | 0.2                            | -                                | -                                 |

**Table S42: 5•2Cl (20µL, 8mM) added to RPMI 1640 medium containing 5% fetal bovine serum**

| Run # | PdI   | Diameter Intensity Measurement (nm) | Integrated Intensity Peak Percentage | Intensity FWHM (Intensity) (± nm) | Integrated Volume Peak Percent | Diameter Number Measurement (nm) | Integrated Number Peak Percentage |
|-------|-------|-------------------------------------|--------------------------------------|-----------------------------------|--------------------------------|----------------------------------|-----------------------------------|
| 1     | 0.252 | 289.3                               | 36.1                                 | 64.00                             | 0.1                            | -                                | -                                 |
|       |       | 12.91                               | 34.9                                 | 3.093                             | 98.9                           | 9.656                            | 0.0                               |
|       |       | 58.37                               | 29.0                                 | 14.47                             | 1.0                            | 42.75                            | 100                               |
| 2     | 0.698 | 369.4                               | 38.6                                 | 123.3                             | 0.2                            | -                                | -                                 |
|       |       | 12.35                               | 30.4                                 | 2.080                             | 98.2                           | 10.66                            | 100                               |
|       |       | 62.29                               | 26.9                                 | 15.03                             | 0.9                            | -                                | -                                 |
| 3     | 0.612 | 348.4                               | 40.2                                 | 119.8                             | 0.1                            | 8.340                            | 99.9                              |
|       |       | 41.71                               | 26.6                                 | 14.26                             | 2.5                            | 27.32                            | 0.1                               |
|       |       | 9.972                               | 21.9                                 | 1.909                             | 96.7                           | -                                | -                                 |

**Table S43: 5•2Cl (30µL, 8mM) added to RPMI 1640 medium containing 5% fetal bovine serum**

| Run # | PdI   | Diameter Intensity Measurement (nm) | Integrated Intensity Peak Percentage | Intensity FWHM (Intensity) (± nm) | Integrated Volume Peak Percent | Diameter Number Measurement (nm) | Integrated Number Peak Percentage |
|-------|-------|-------------------------------------|--------------------------------------|-----------------------------------|--------------------------------|----------------------------------|-----------------------------------|
| 1     | 0.372 | 114.4                               | 30.4                                 | 21.39                             | 0.2                            | -                                | -                                 |
|       |       | 11.09                               | 27.8                                 | 1.427                             | 98.4                           | 10.14                            | 100                               |
|       |       | 1076                                | 27.5                                 | 175.8                             | 0.2                            | -                                | -                                 |
| 2     | 0.249 | 37.84                               | 14.3                                 | 8.753                             | 0.2                            | -                                | -                                 |
|       |       | 371.4                               | 34.5                                 | 86.41                             | 0.2                            | -                                | -                                 |
|       |       | 12.98                               | 33.4                                 | 1.635                             | 99.3                           | 11.81                            | 100                               |
| 3     | 0.246 | 79.62                               | 32.1                                 | 16.84                             | 0.6                            | -                                | -                                 |
|       |       | 288.7                               | 46.6                                 | 91.03                             | 0.2                            | -                                | -                                 |
|       |       | 12.63                               | 31.5                                 | 1.815                             | 98.9                           | 11.39                            | 100                               |
|       |       | 59.03                               | 22.0                                 | 13.05                             | 0.9                            | 46.66                            | -                                 |

**Table S44: 5•2Cl (30µL, 8mM) added to RPMI 1640 medium containing 5% fetal bovine serum approximately 4 hours after addition**

| Run # | PdI  | Diameter Intensity Measurement (nm) | Integrated Intensity Peak Percentage | Intensity FWHM (Intensity) (± nm) | Integrated Volume Peak Percent | Diameter Number Measurement (nm) | Integrated Number Peak Percentage |
|-------|------|-------------------------------------|--------------------------------------|-----------------------------------|--------------------------------|----------------------------------|-----------------------------------|
| 1     | 1.00 | 372.6                               | 62.9                                 | 100                               | 0.4                            | -                                | -                                 |
|       |      | 12.14                               | 22.2                                 | 1.841                             | 98.1                           | 10.74                            | 100                               |
|       |      | 43.99                               | 14.9                                 | 7.895                             | 1.5                            | 37.05                            | -                                 |



## S5. References

1. Takahashi, M.; Suzuki, Y.; Ichihashi, Y.; Yamashita, M.; Kawai, H. 1,3,8,10-Tetrahydro-2,9-Diazadibenzo[cd,lm]perylene: Synthesis of Reduced Perylene Bisimide Analogues. *Tetrahedron Lett.* **2007**, *48*, 357–359.
2. Ustinov, A. V.; Dubnyakova, V. V.; Korshun, V. A. A Convenient ‘Click Chemistry’ Approach to Perylene Diimide–Oligonucleotide Conjugates. *Tetrahedron* **2008**, *64*, 1467–1473.
3. Ramanan, C.; Smeigh, A. L.; Anthony, J. E.; Marks, T. J.; Wasielewski, M. R. Competition between Singlet Fission and Charge Separation in Solution-Processed Blend Films of 6,13-Bis(triisopropylsilylethynyl)pentacene with Sterically-Encumbered Perylene-3,4:9,10-bis(dicarboximide)s. *J. Am. Chem. Soc.* **2011**, *134*, 386–397.
4. Basuray, A. N.; Jacquot de Rouville, H.-P.; Hartlieb, K. J.; Kikuchi, T.; Strutt, N. L.; Bruns, C. J.; Ambrogio, M. W.; Avestro, A.-J.; Schneebeli, S. T.; Fahrenbach, A. C. *et al.* The Chameleonic Nature of Diazaperopyrenium Recognition Processes. *Angew. Chem., Int. Ed.* **2012**, *51*, 11872–11877.
5. Ma, J.; Lu, S.; Yu, L.; Tian, J.; Li, J.; Wang, H.; Xu, W. FaDu Cell Characteristics Induced by Multidrug Resistance. *Oncology Reports* **2011**, *26*, 1189–1195.
6. Drummond, C. J.; Finlay, G. J.; Broome, L.; Marshall, E. S.; Richardson, E.; Baguley, B. C. Action of SN 28049, a New DNA Binding Topoisomerase II-Directed Antitumour Drug: Comparison with Doxorubicin and Etoposide. *Invest. New Drugs* **2011**, *29*, 1102–1110.
